# Supplementary material for: Epoxide ring-opening and Meinwald rearrangement reactions of epoxides catalyzed by mesoporous aluminosilicates
Source: Royal Society of Chemistry journal article supplement (doi:10.1039/b900719a), 2009-01-01

## Supplementary Information

# Epoxide ring-opening and Meinwald rearrangement reactions of epoxides catalyzed by mesoporous aluminosilicates

Mathew W. C. Robinson, A. Matthew Davies, Richard Buckle, Ian Mabbett, Stuart  
H. Taylor and Andrew E. Graham\*

School of Chemistry, Cardiff University, Park Place,  
Cardiff, CF10 3AT, UK.  
Fax +44 (0)29 20874030;  
E-mail: [GrahamAE@Cardiff.ac.uk](mailto:GrahamAE@Cardiff.ac.uk)

## Table of Contents

1.  $^1\text{H}$  and  $^{13}\text{C}$  NMR spectra.....S2-S42

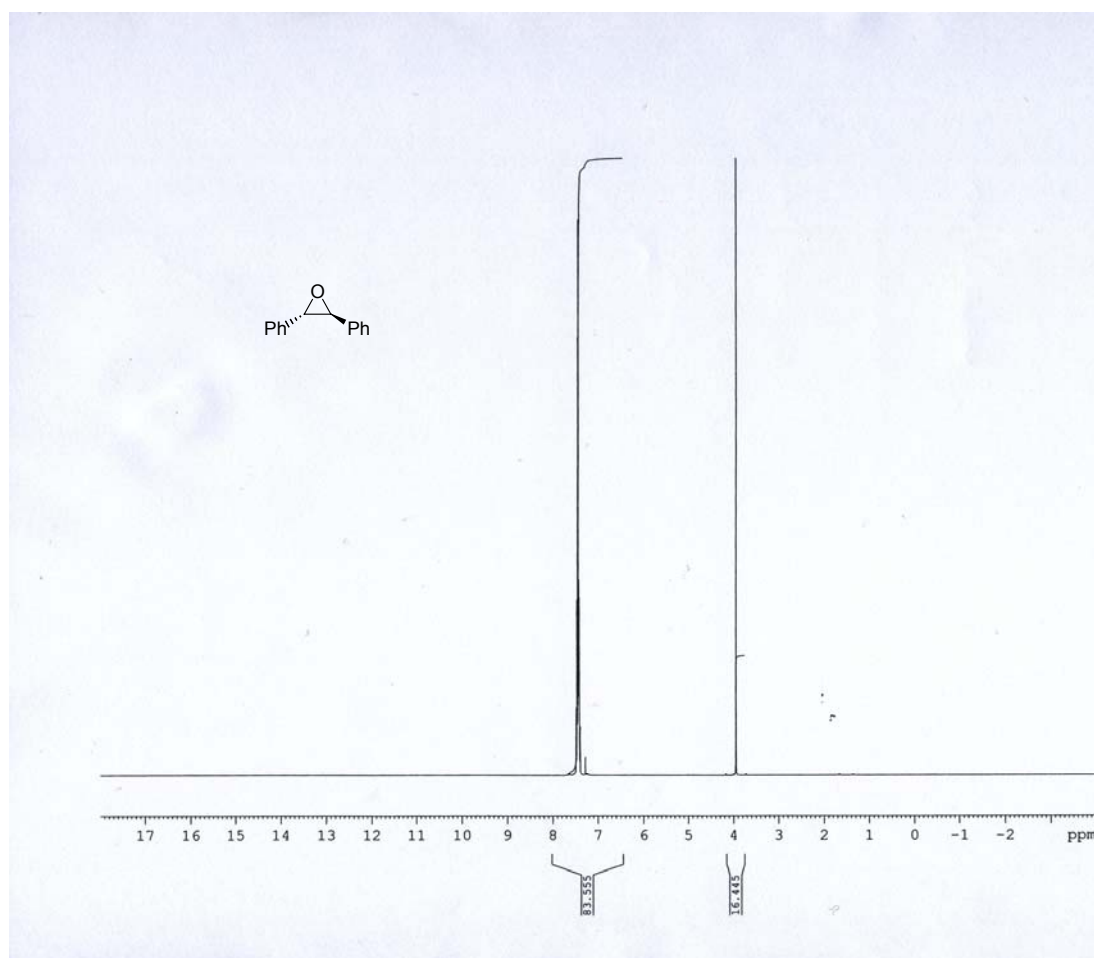

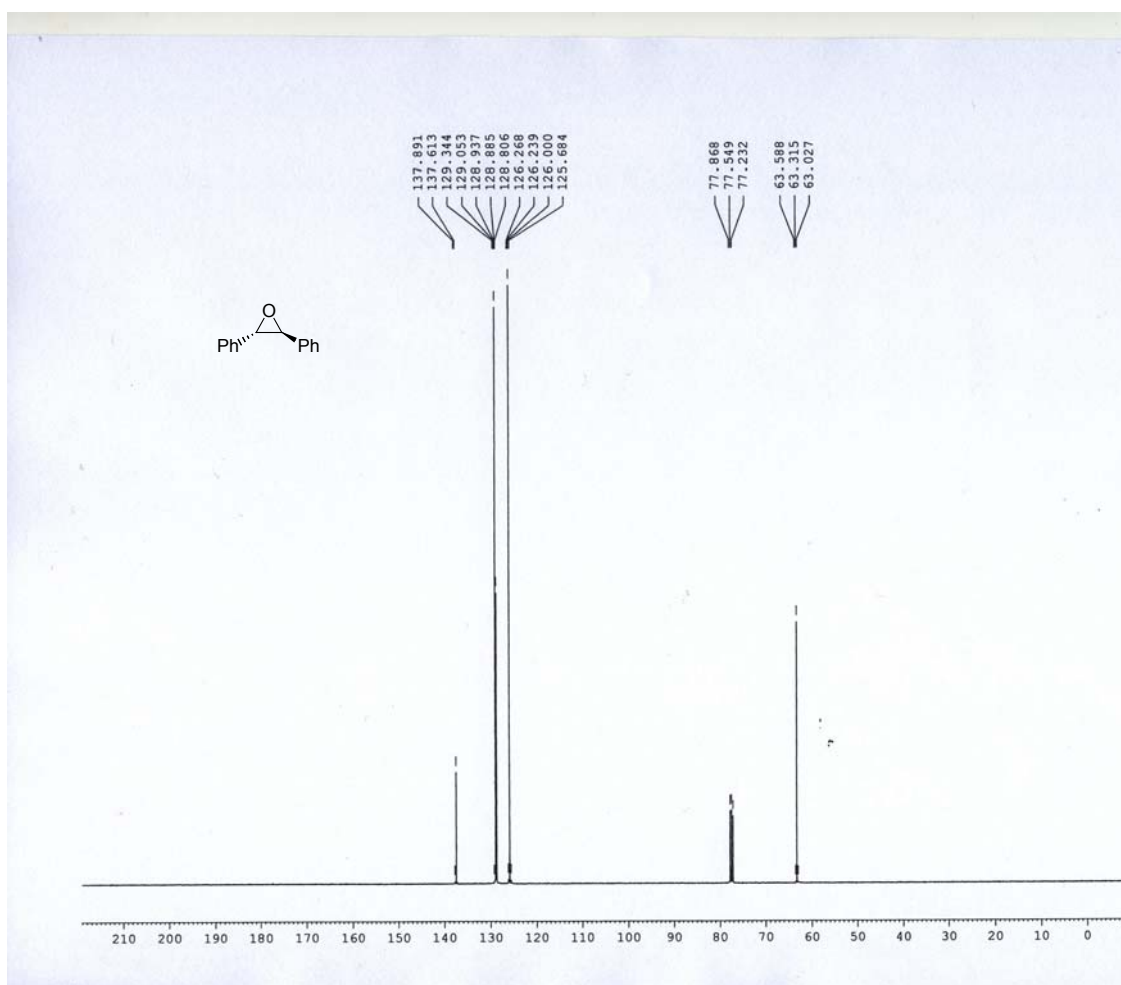

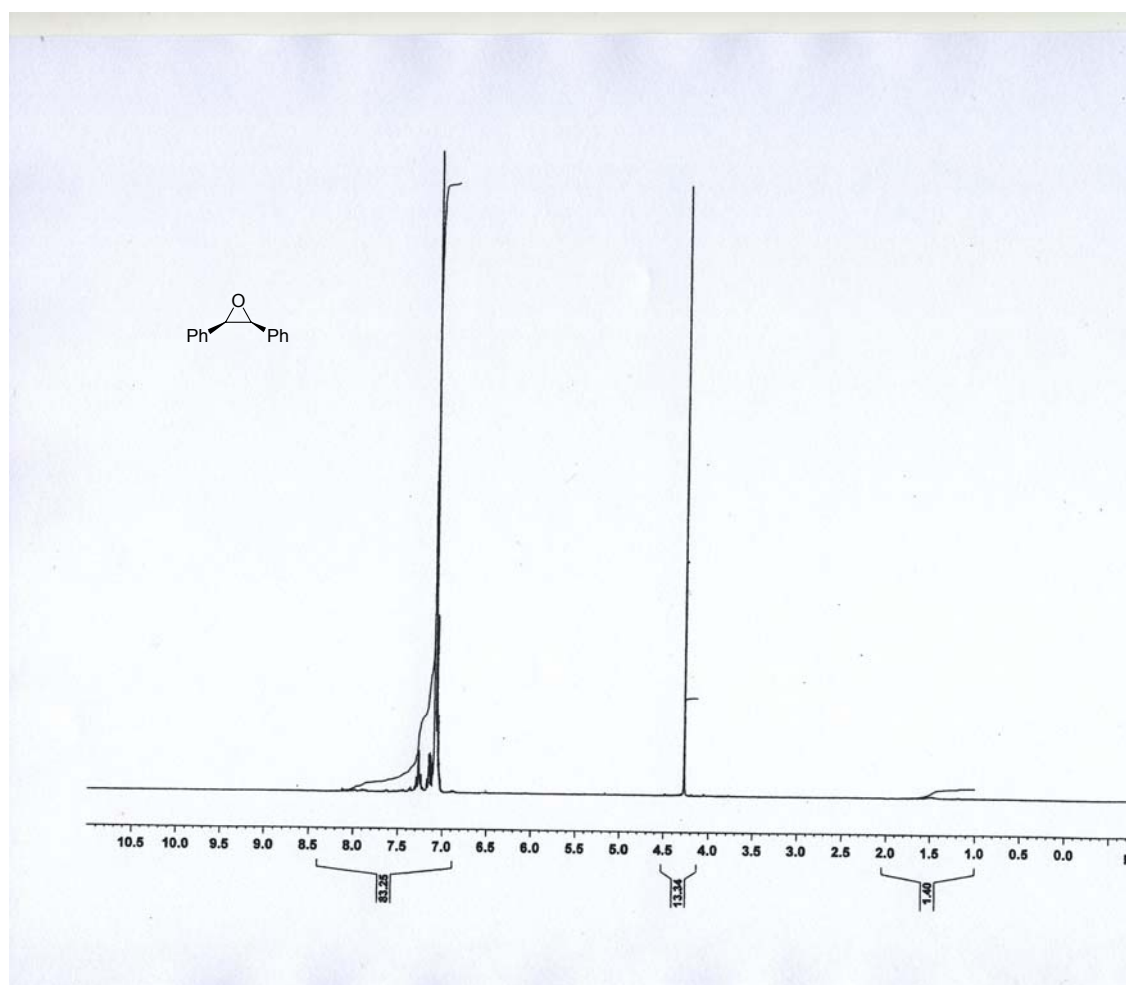

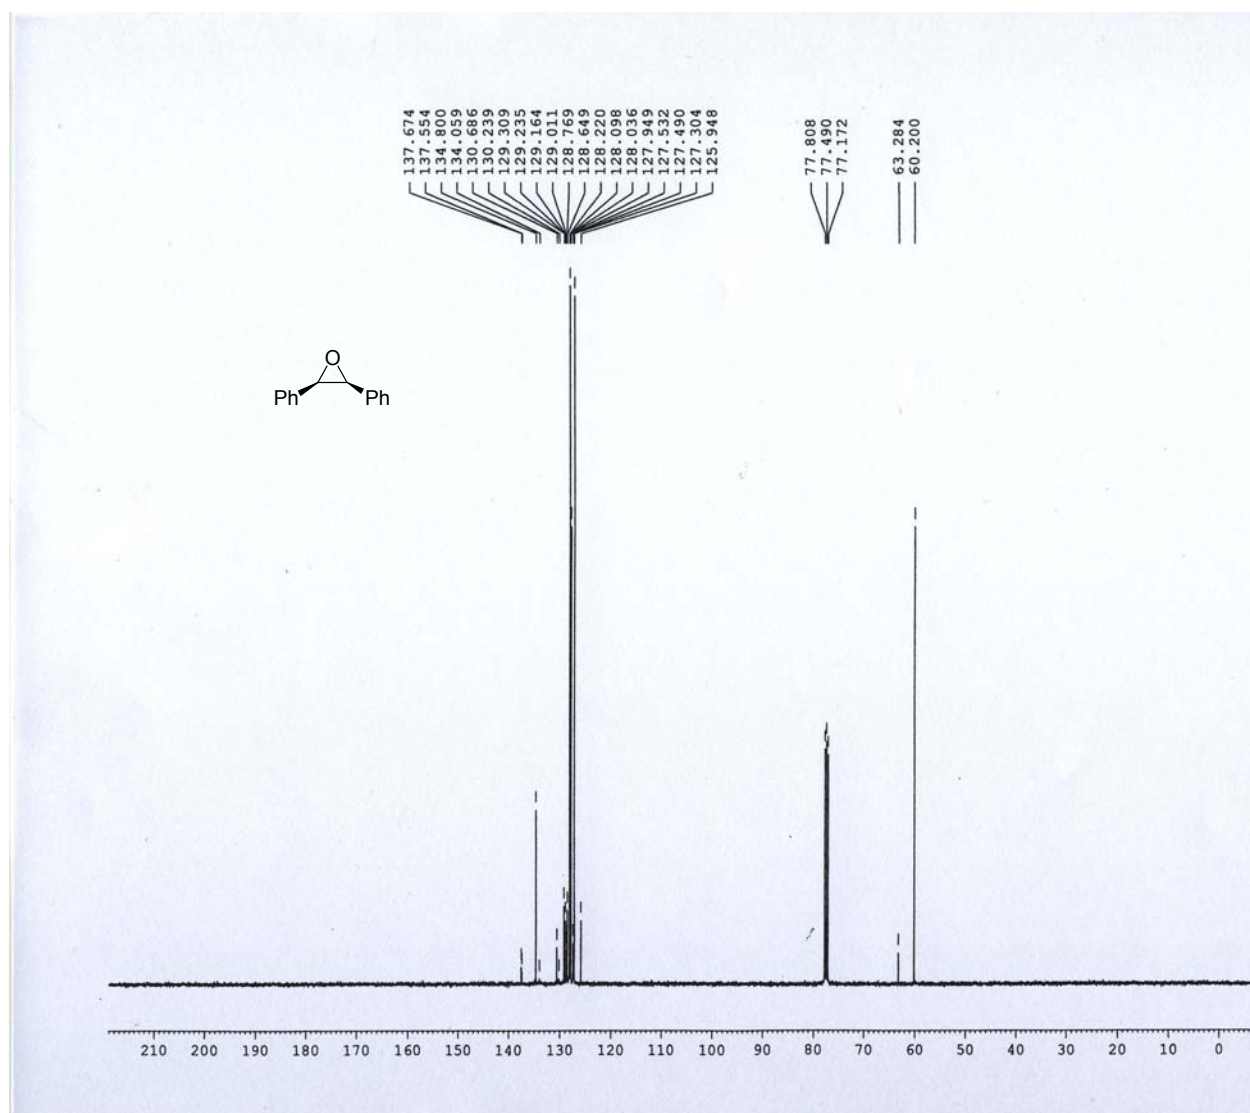

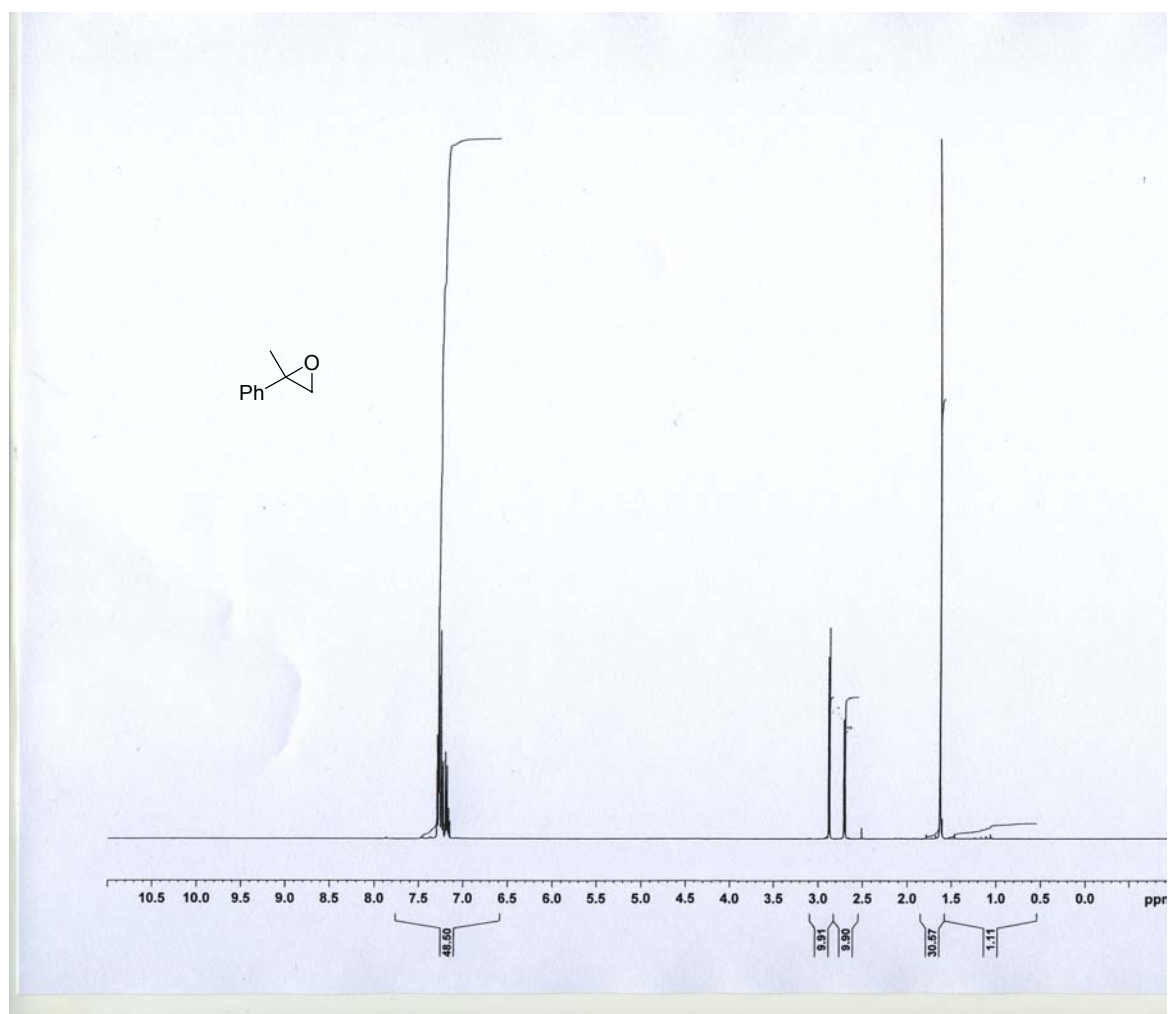

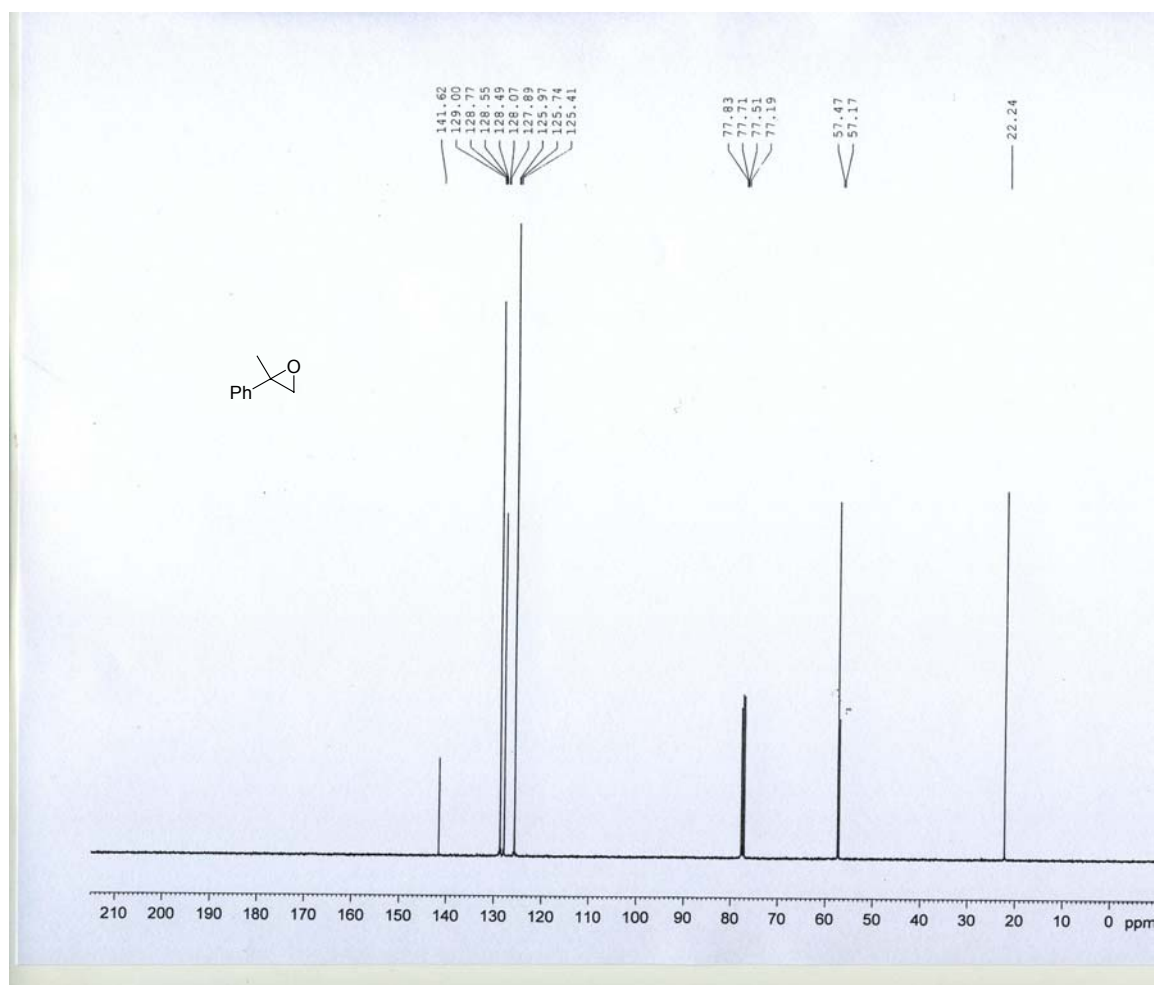

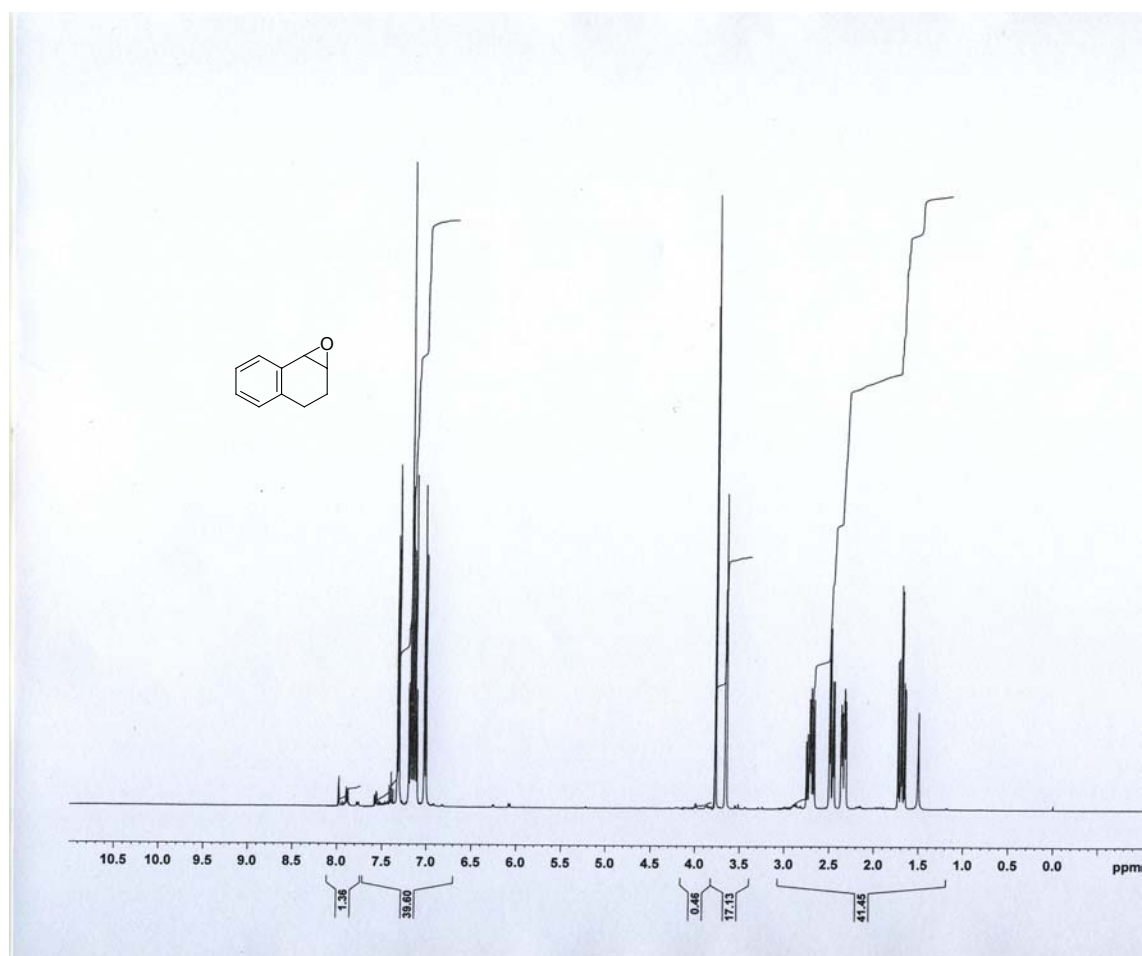



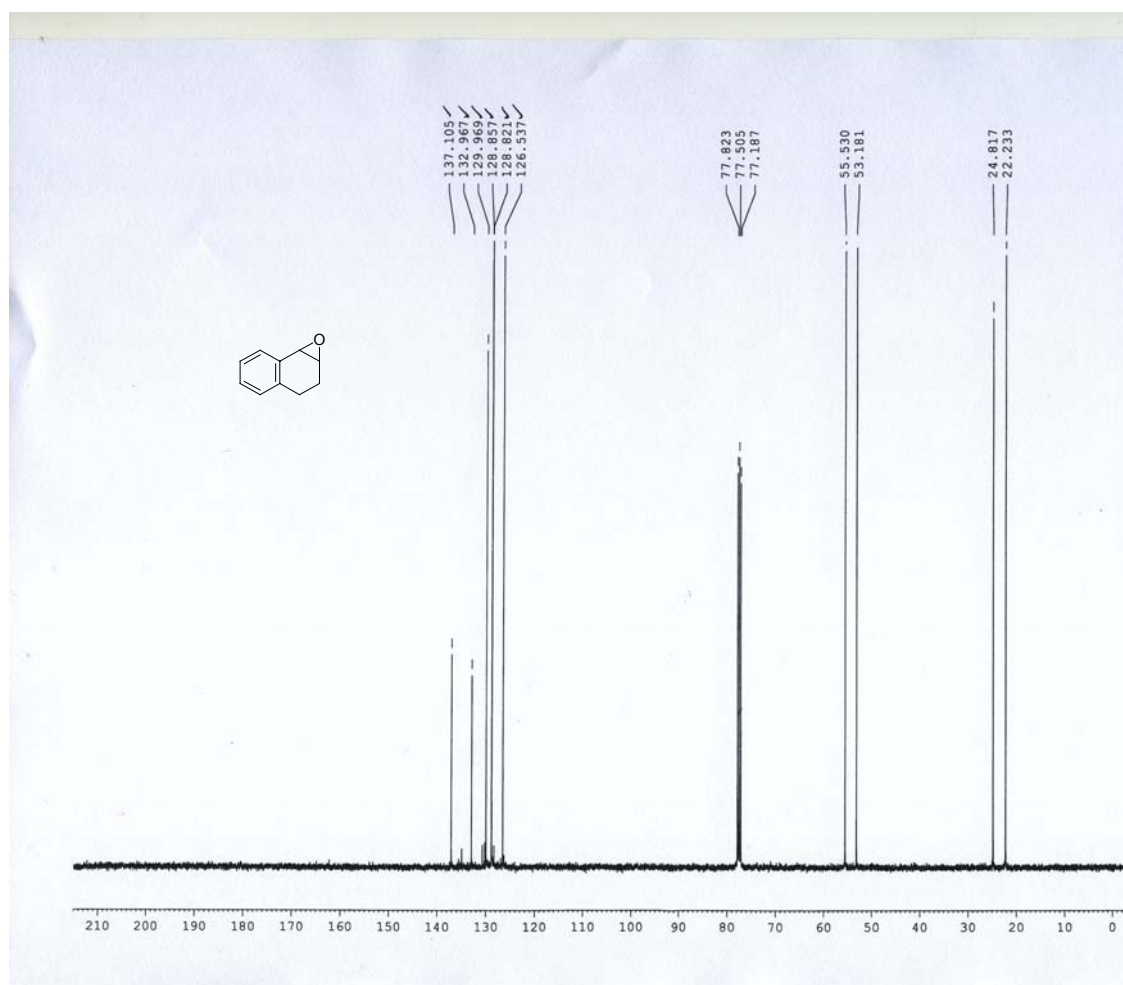

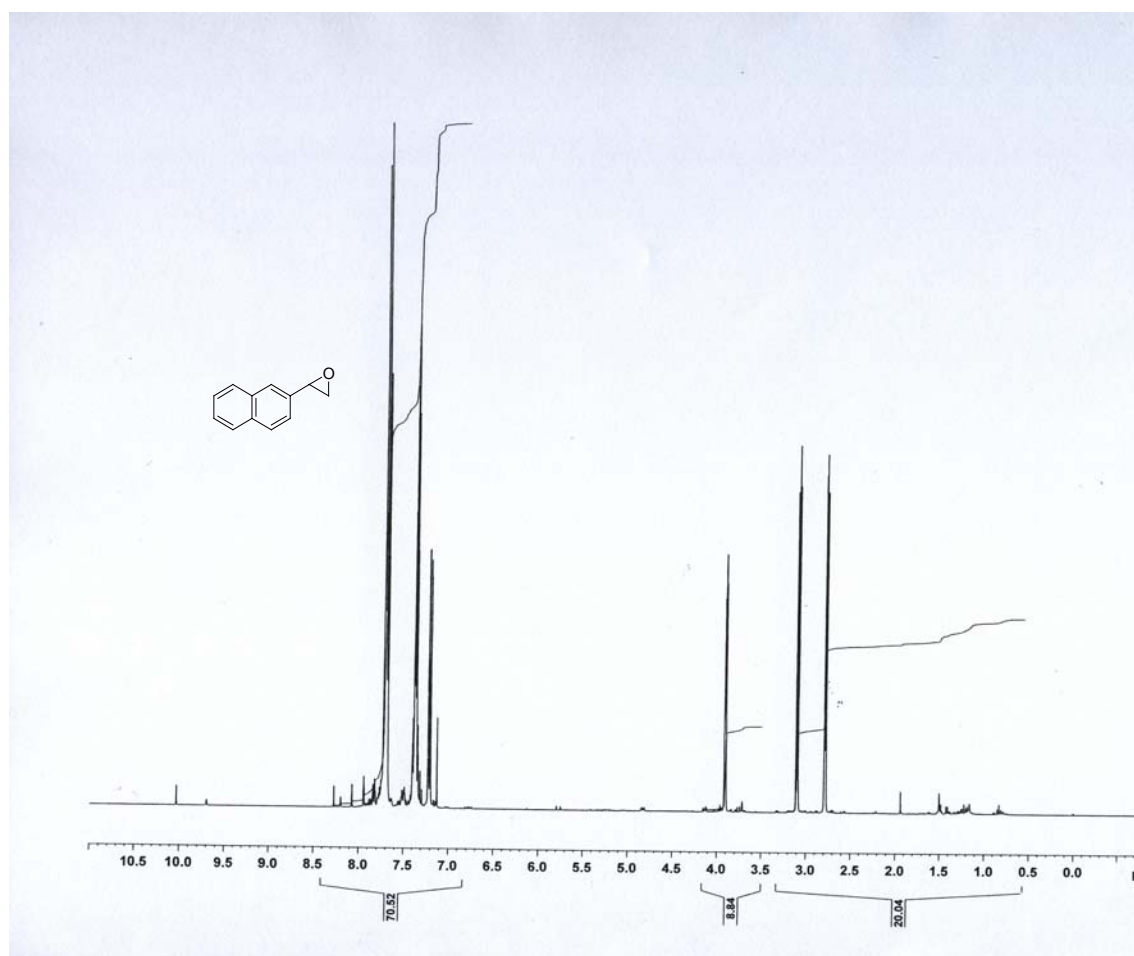

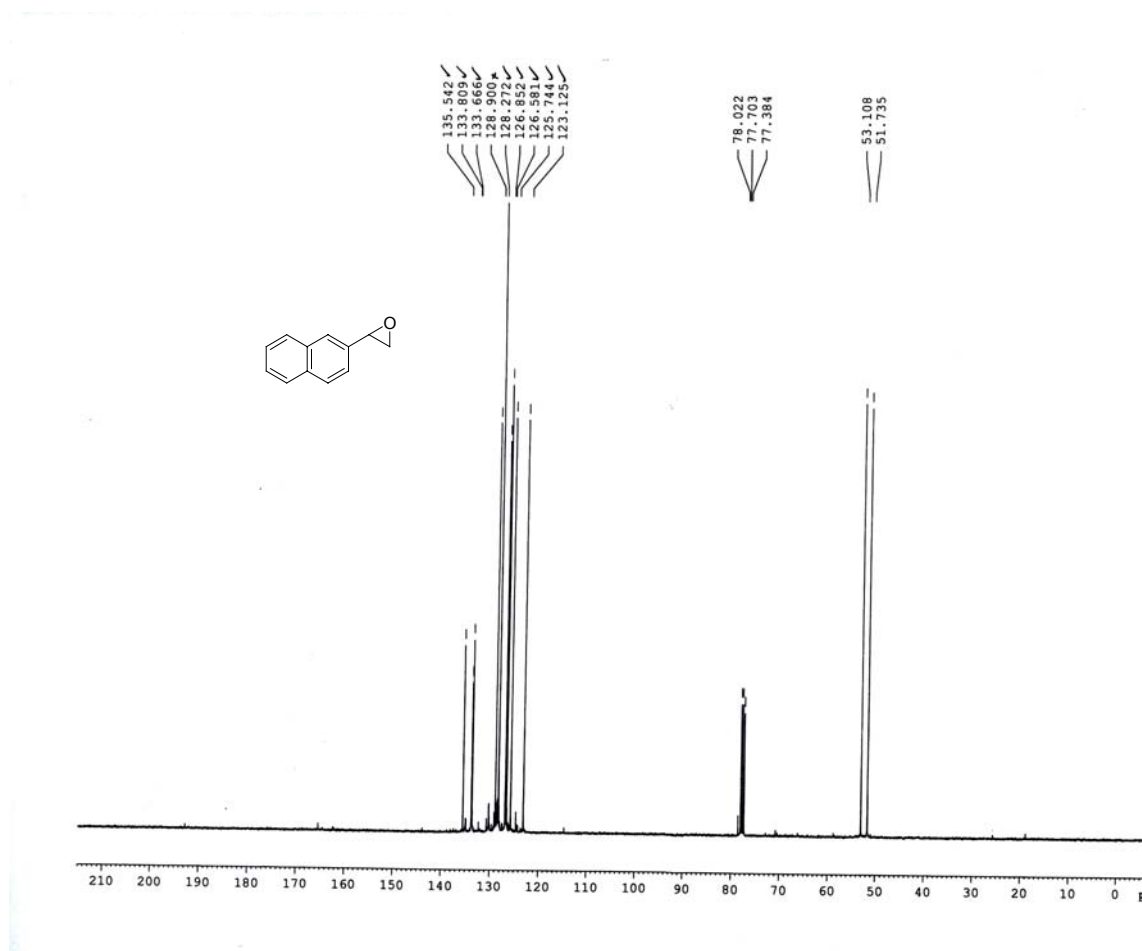

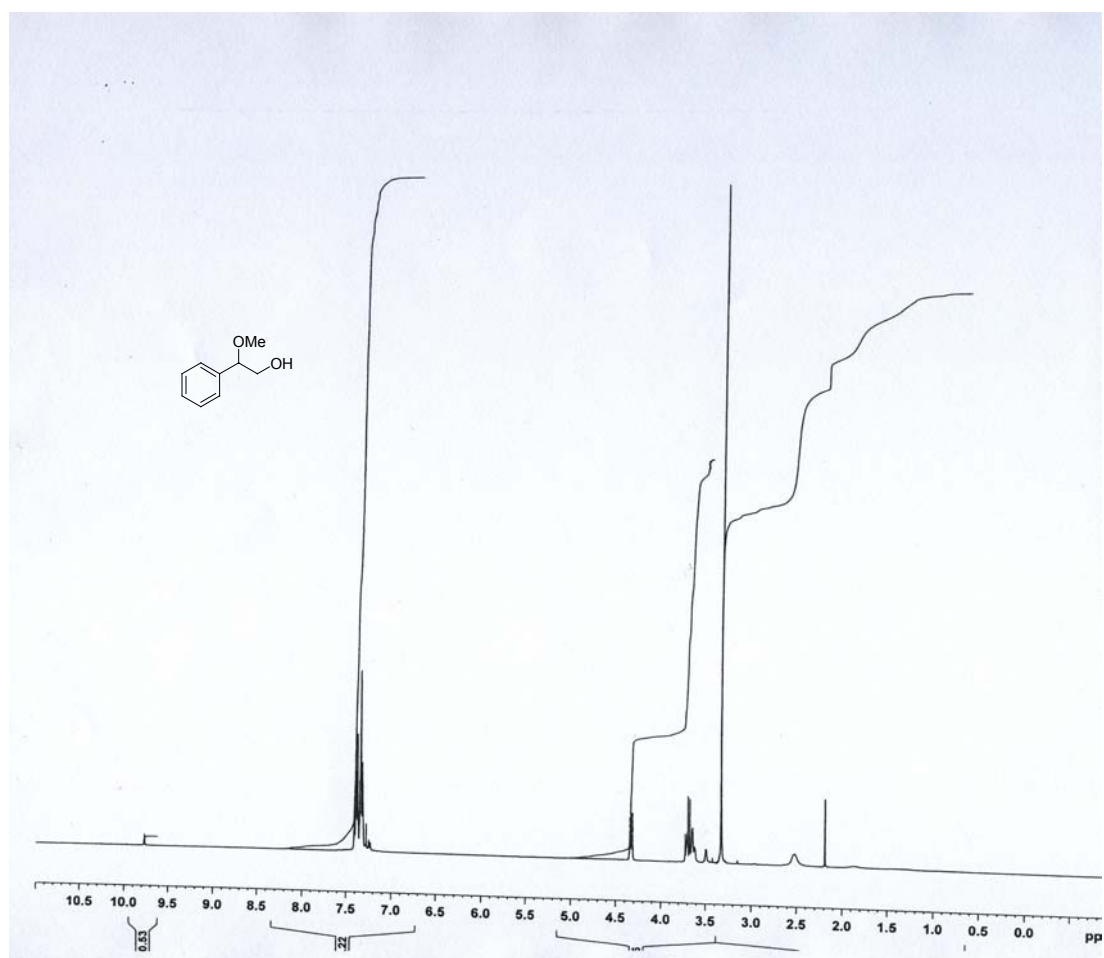

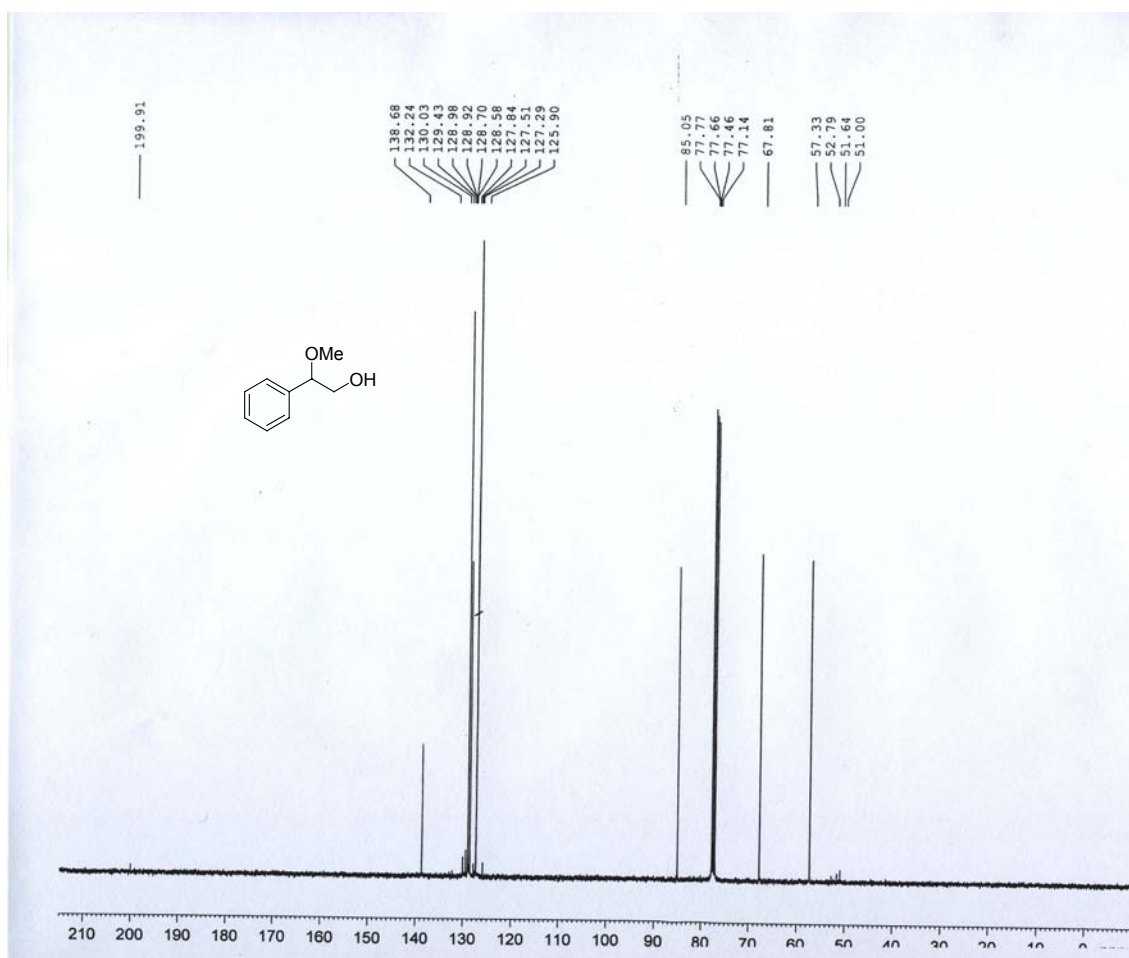

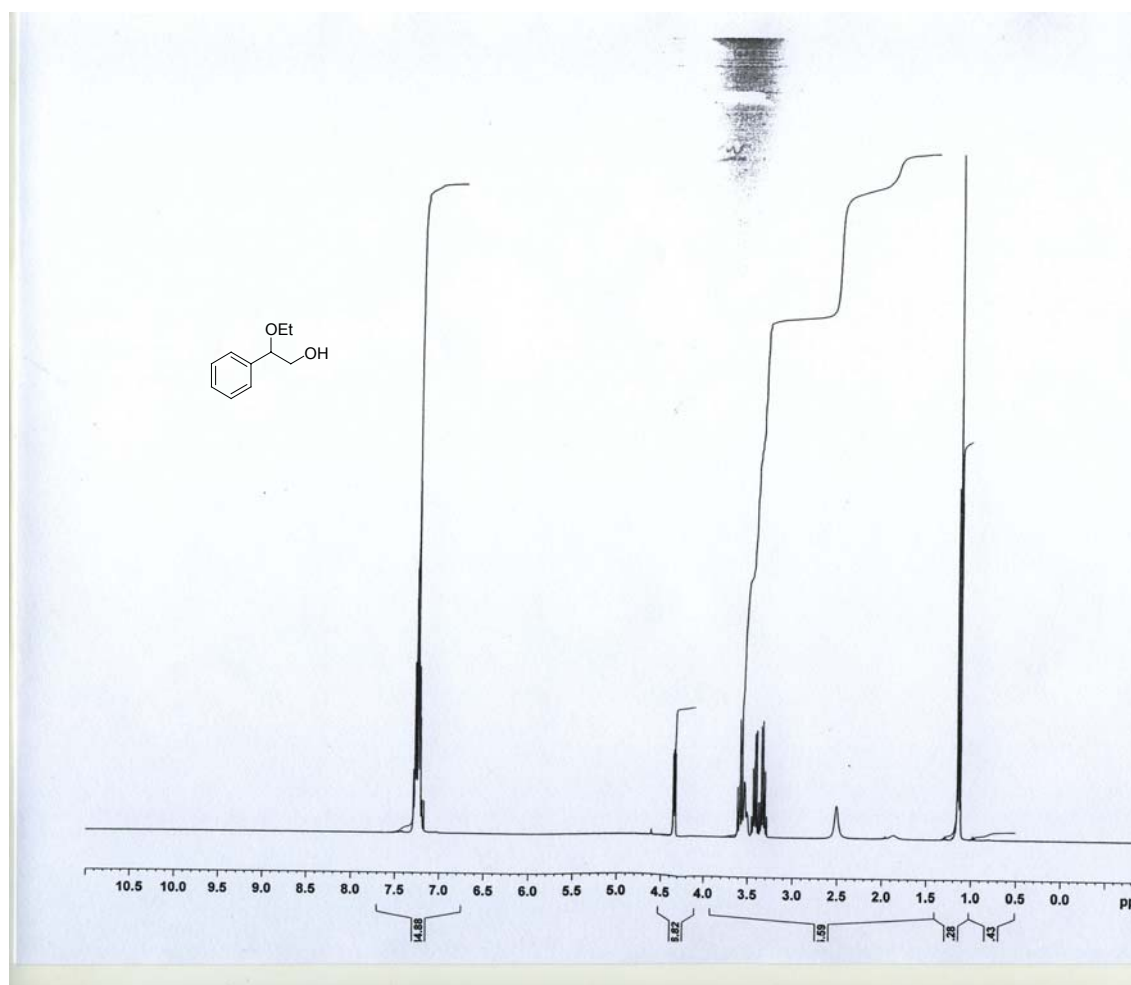

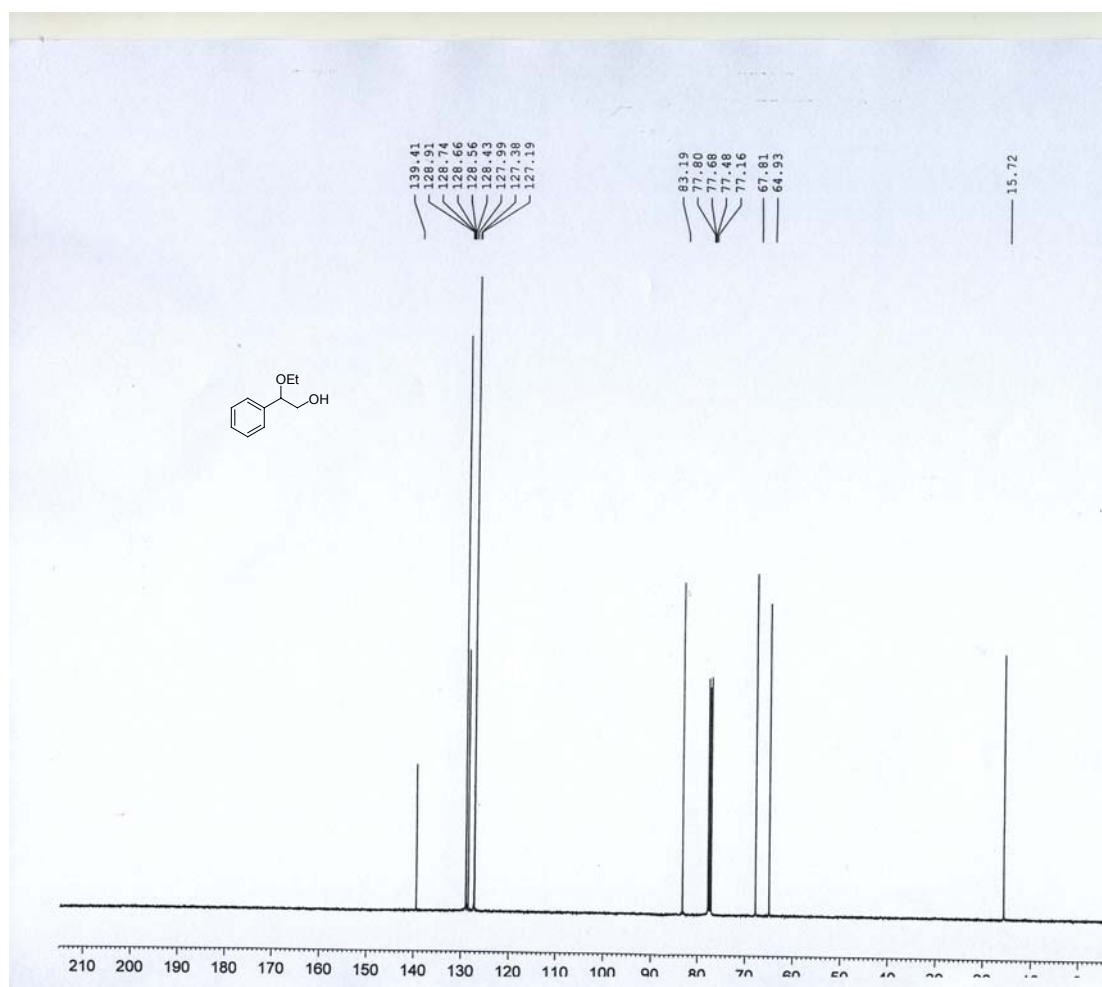

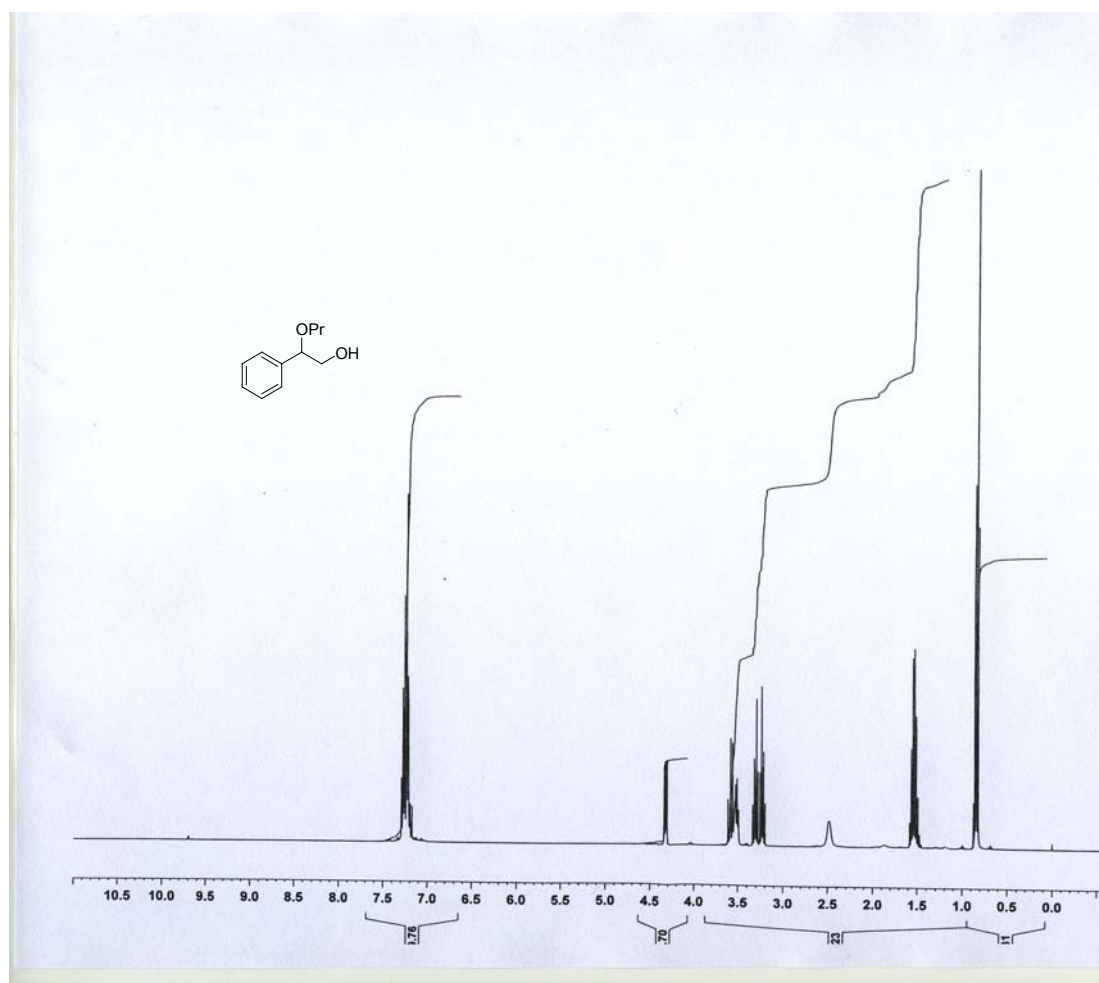



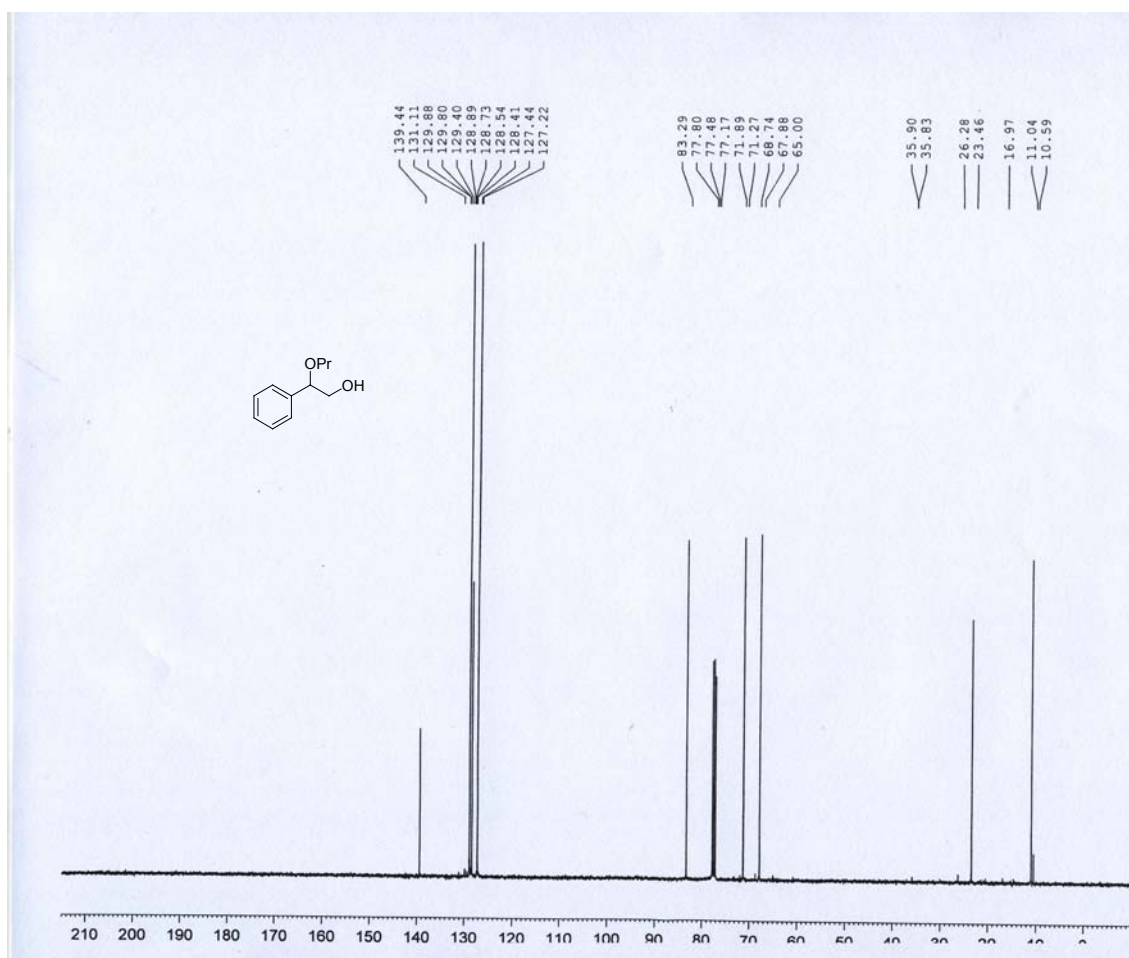



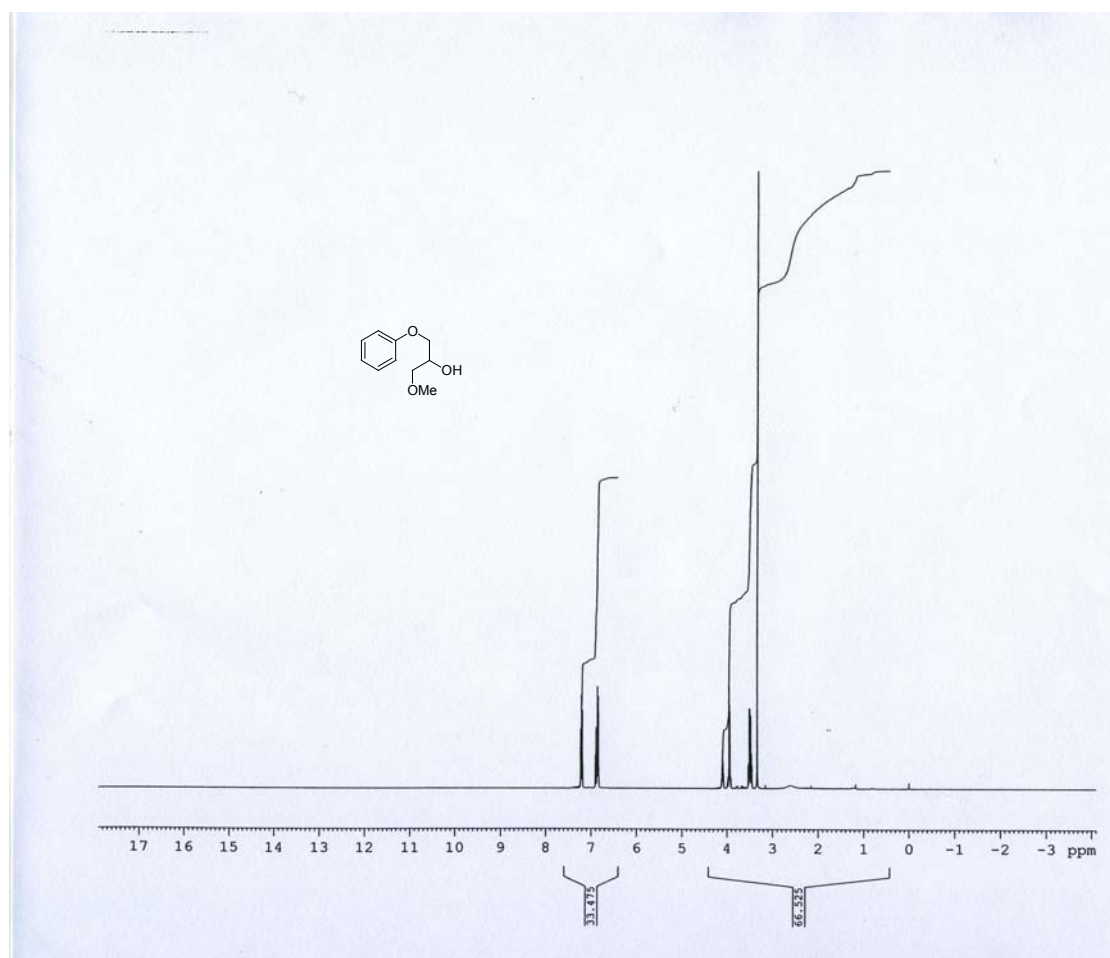

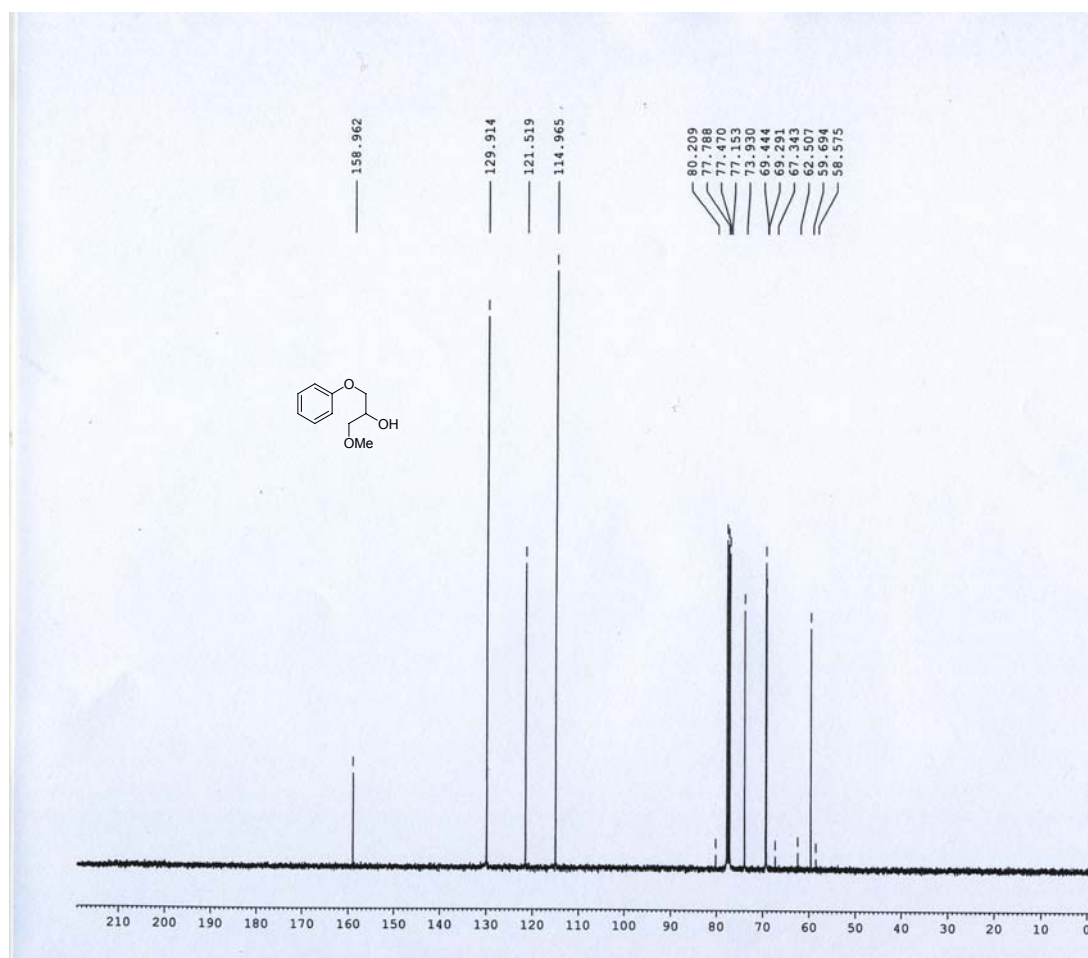

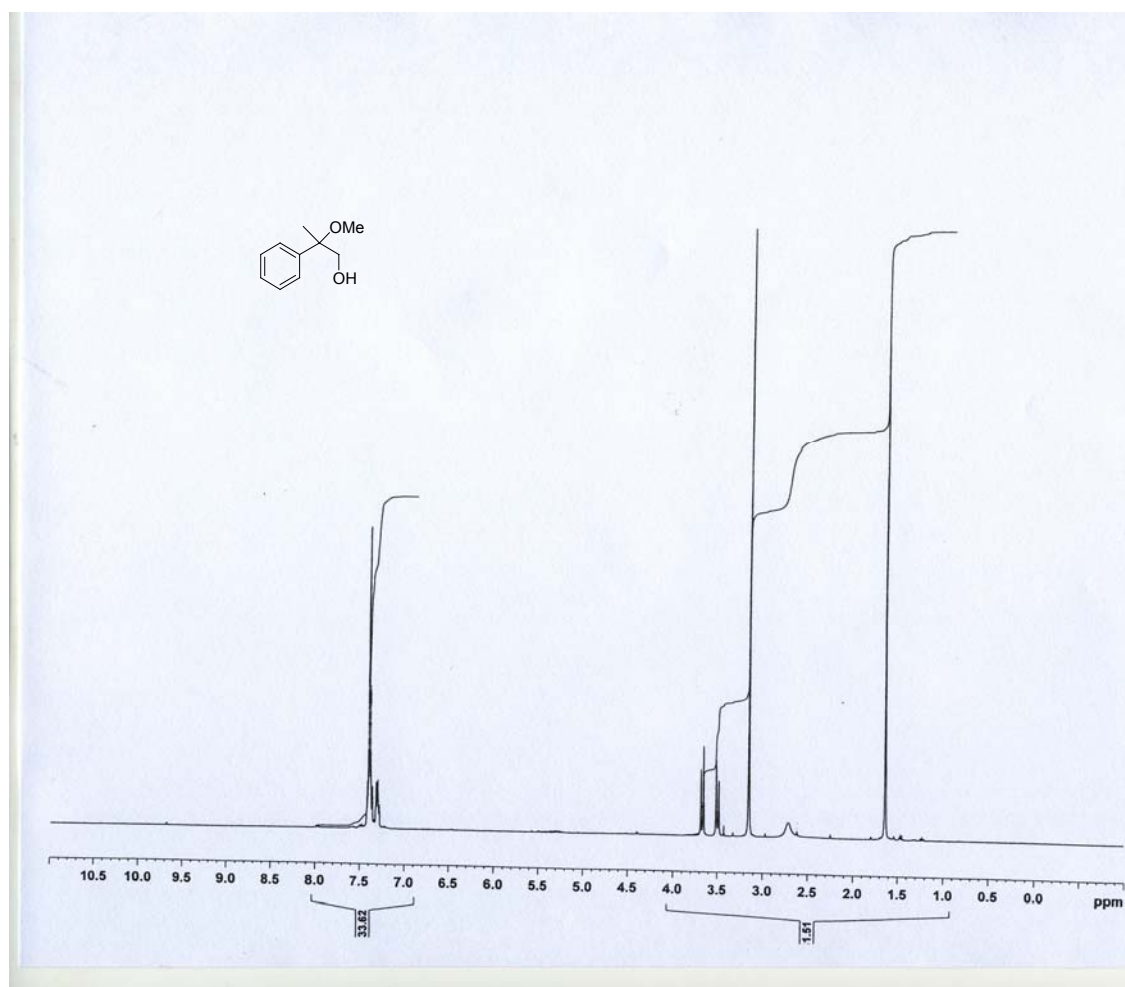

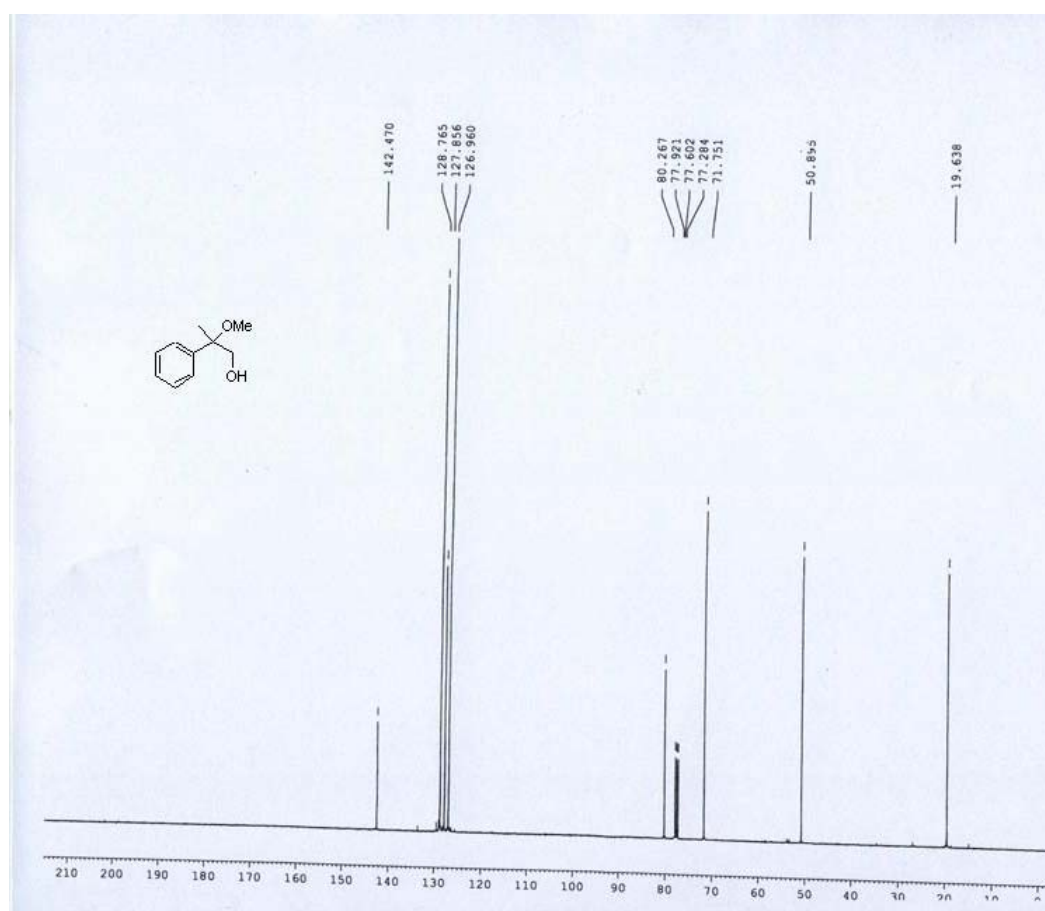

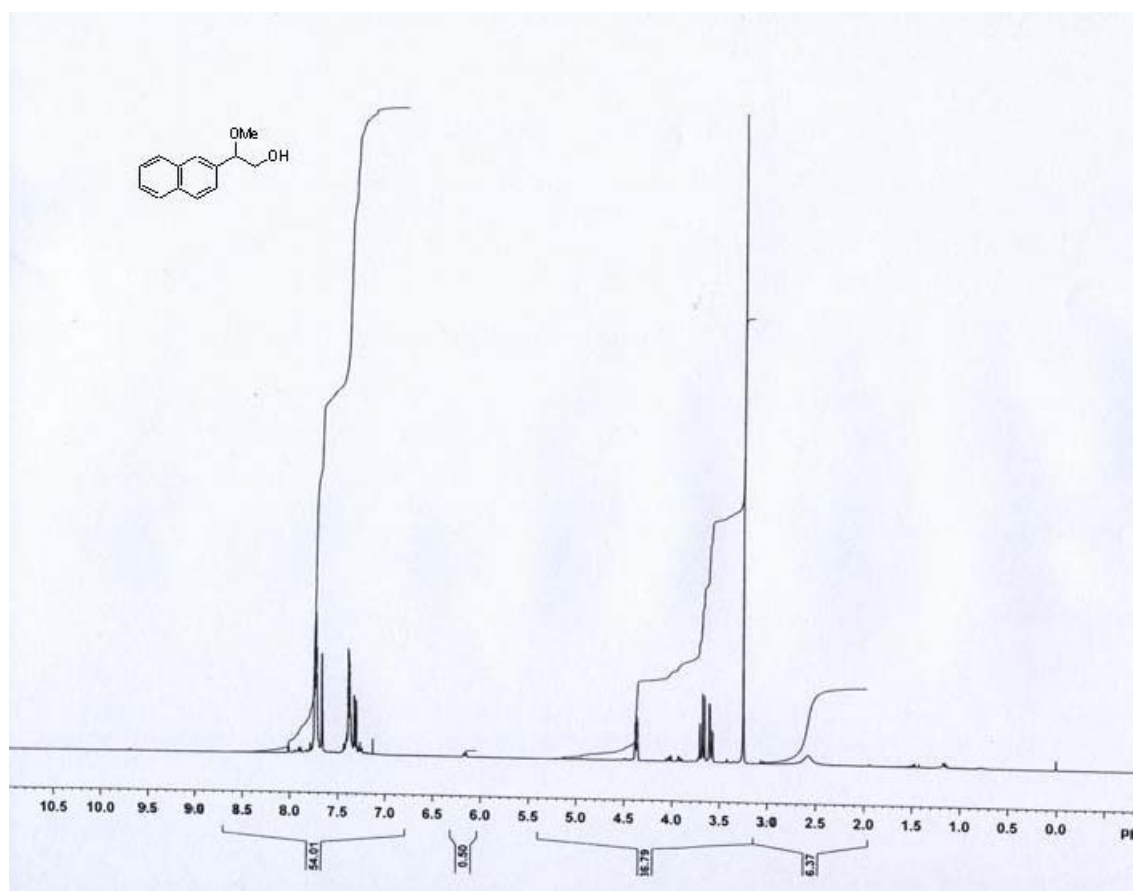

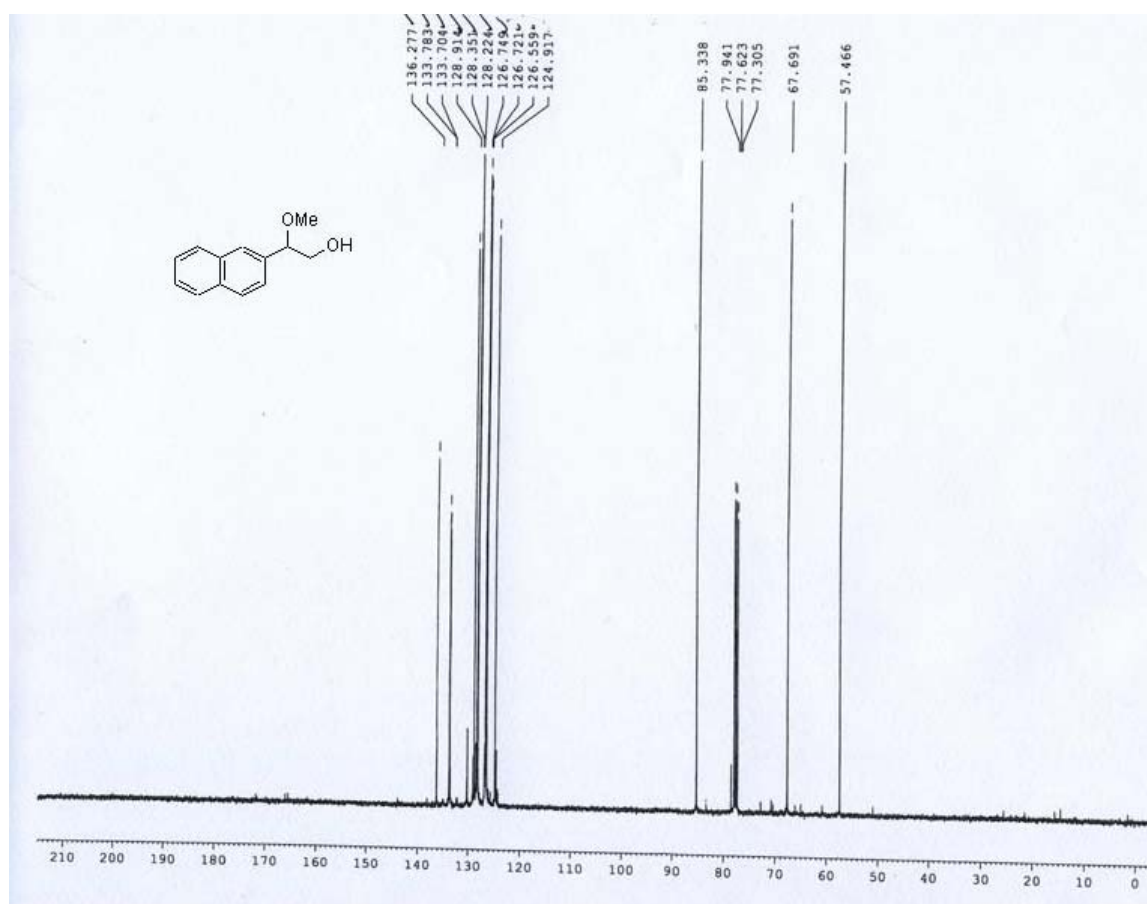



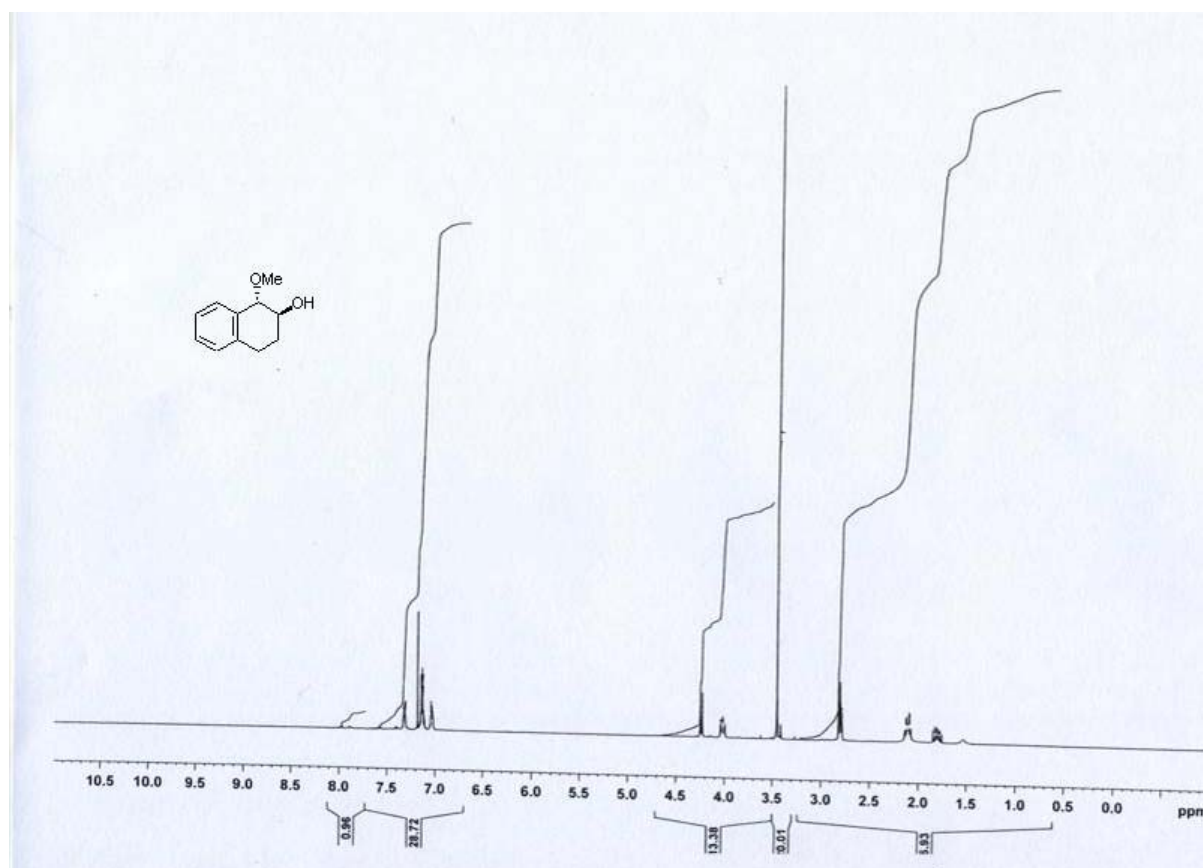

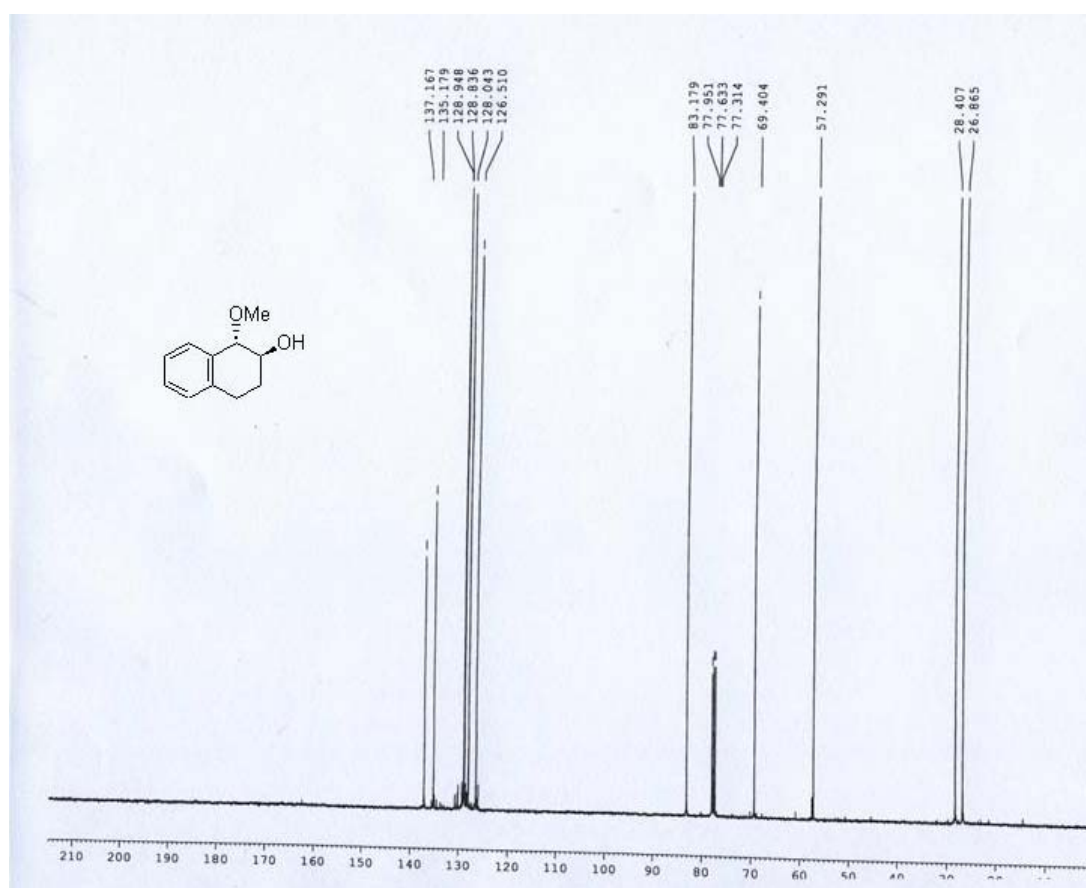

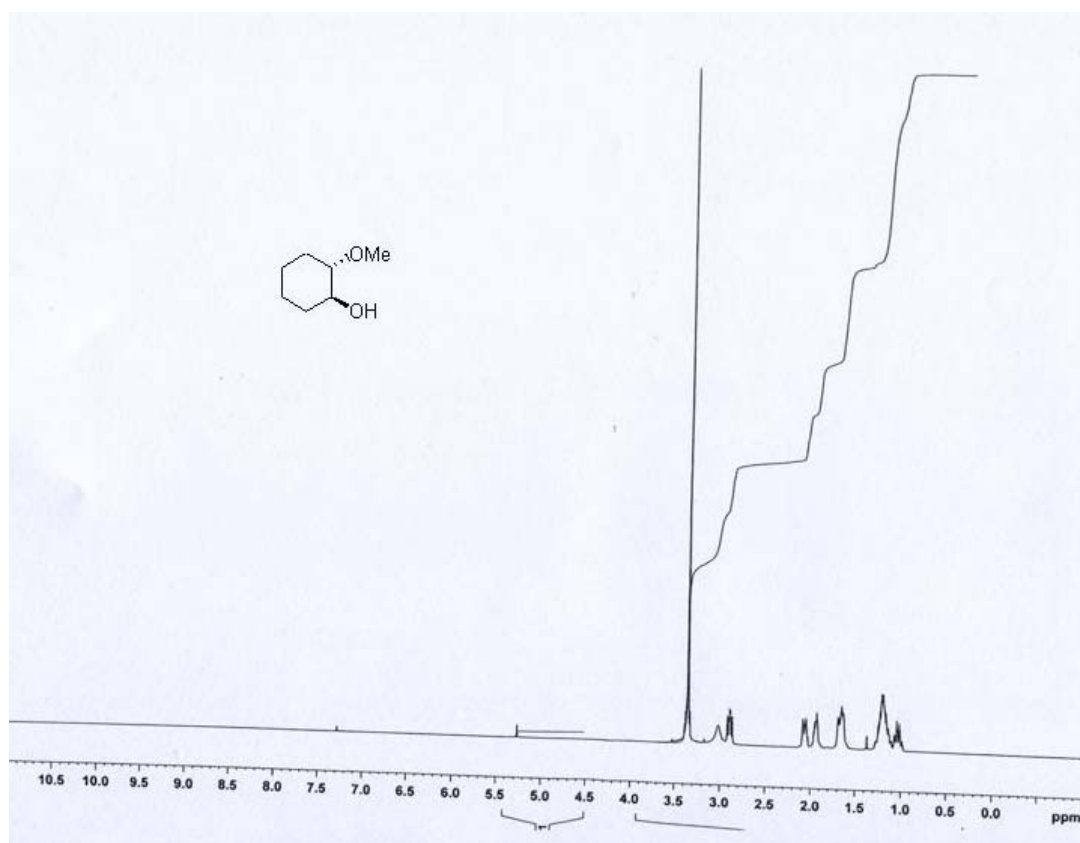

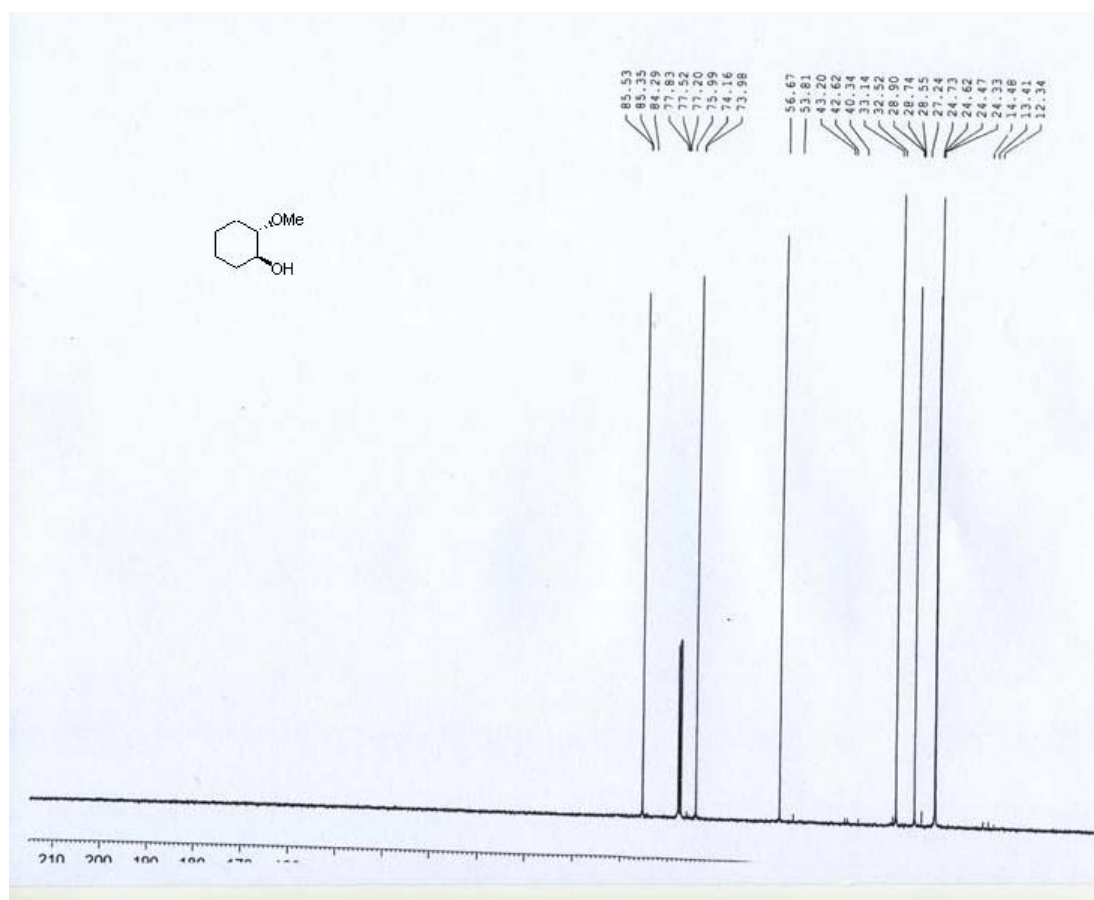

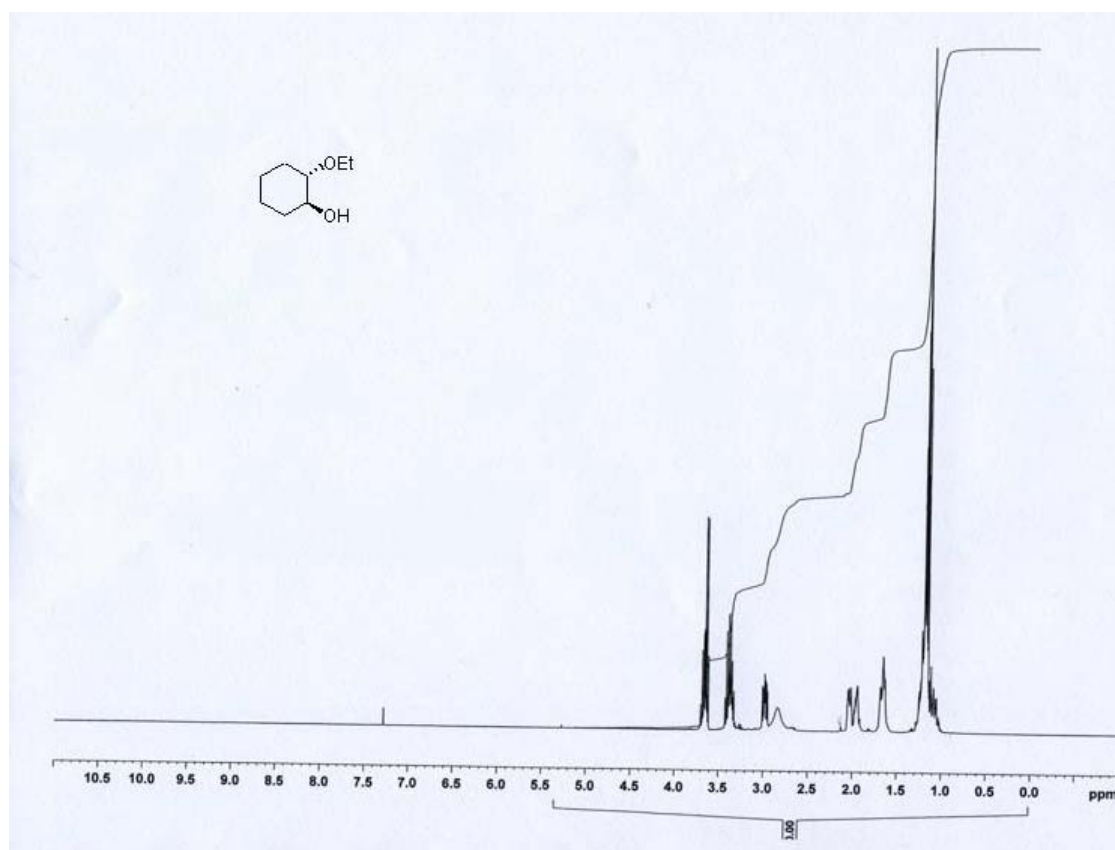

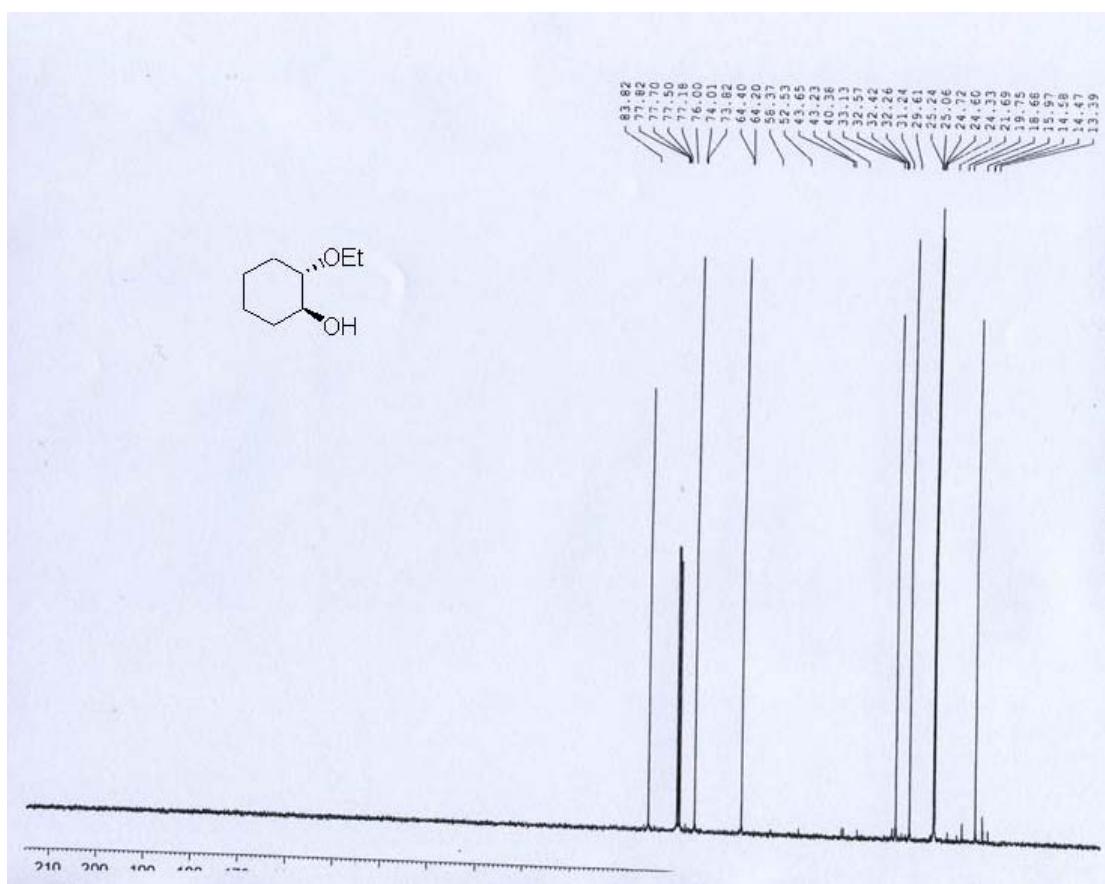

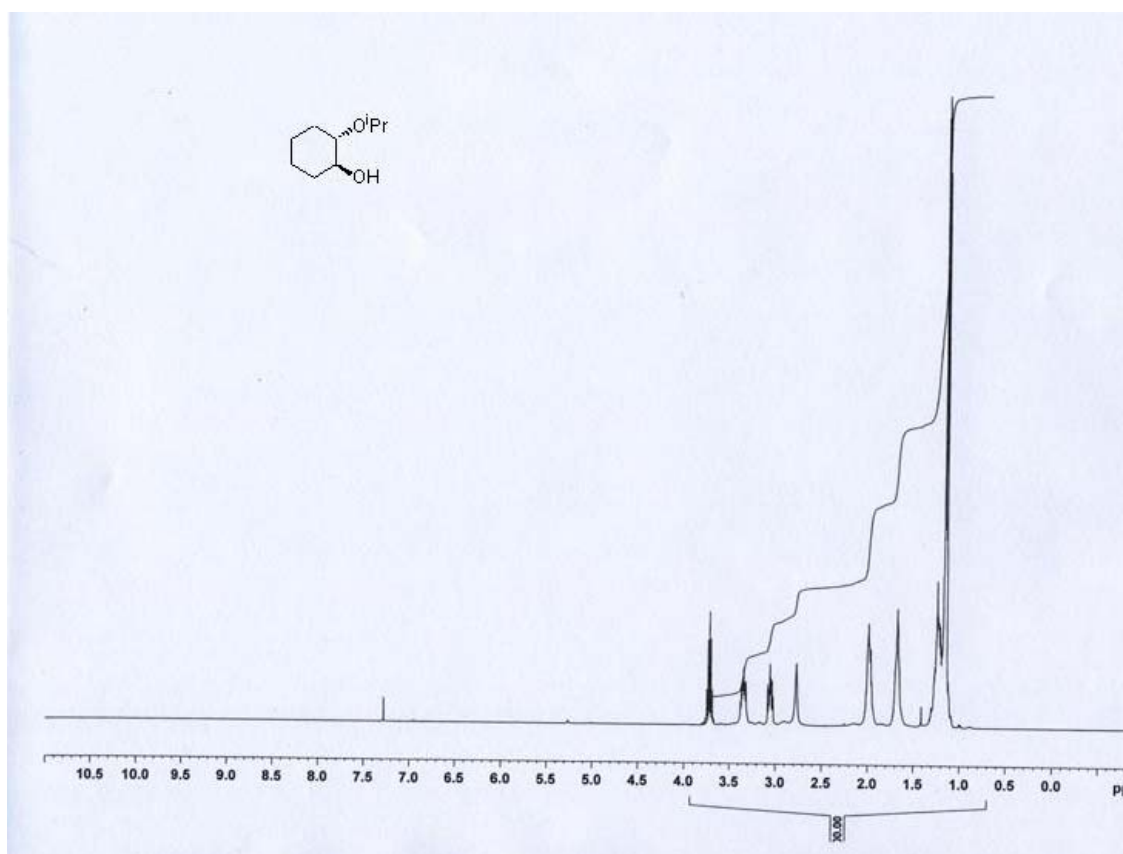

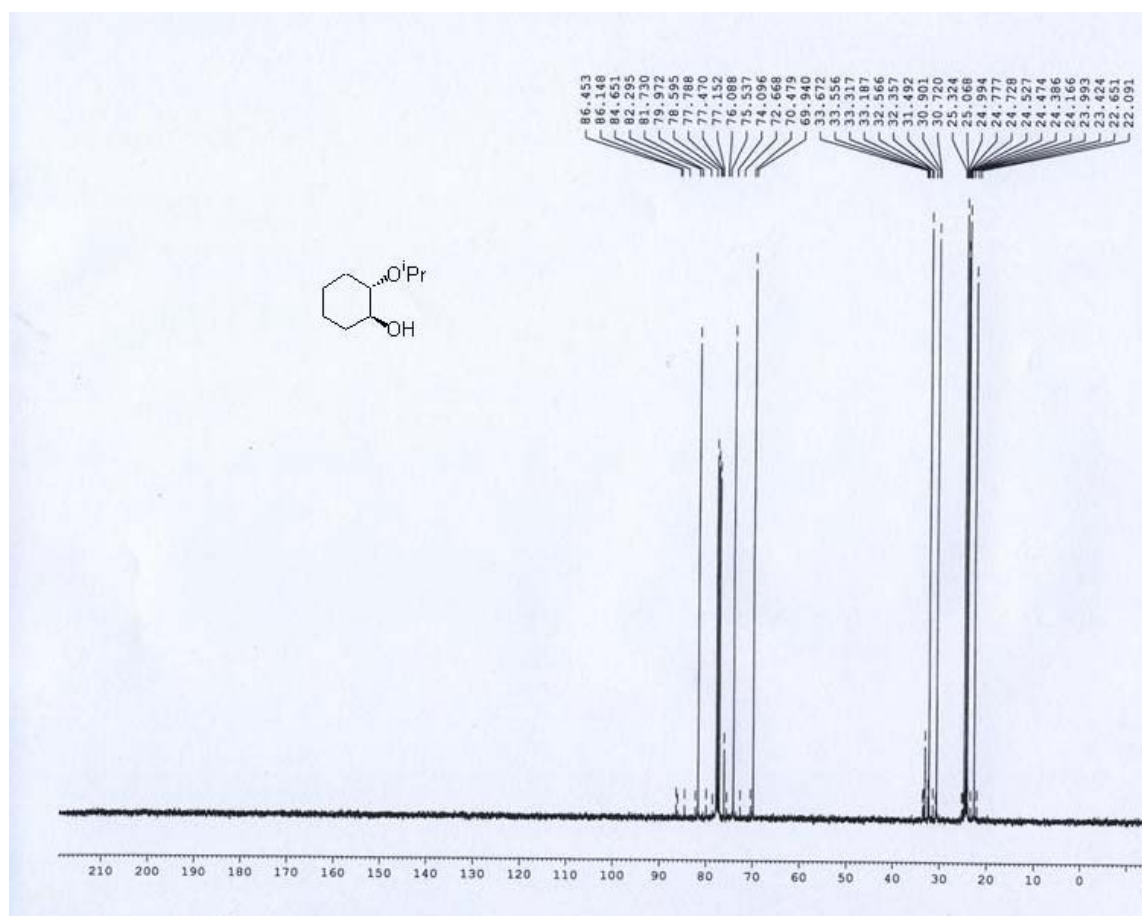



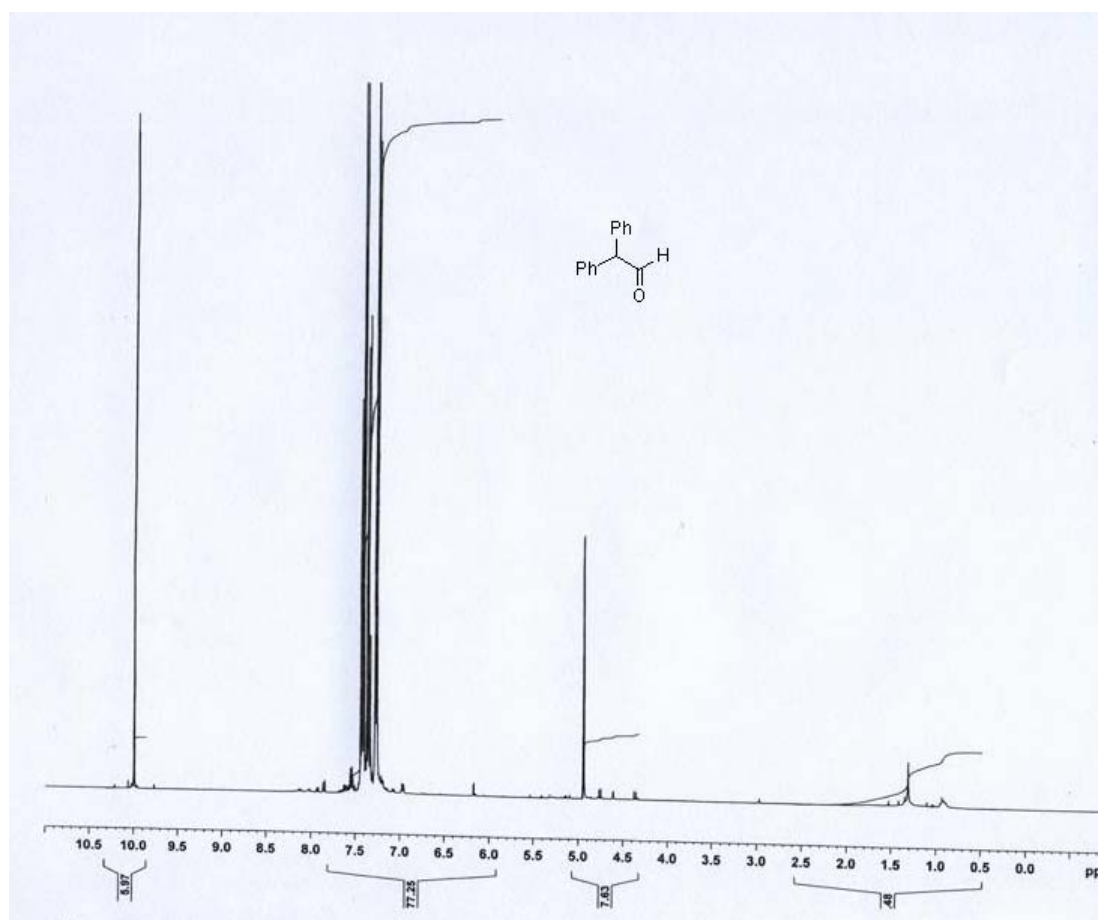

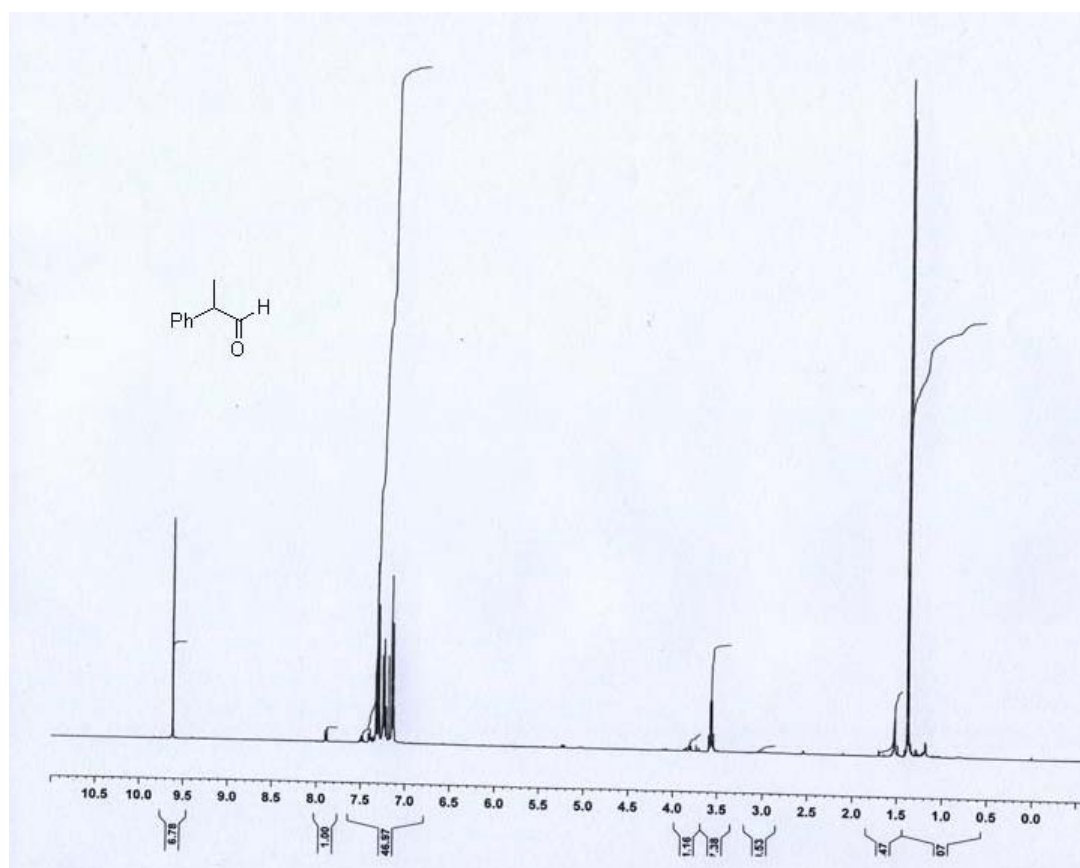

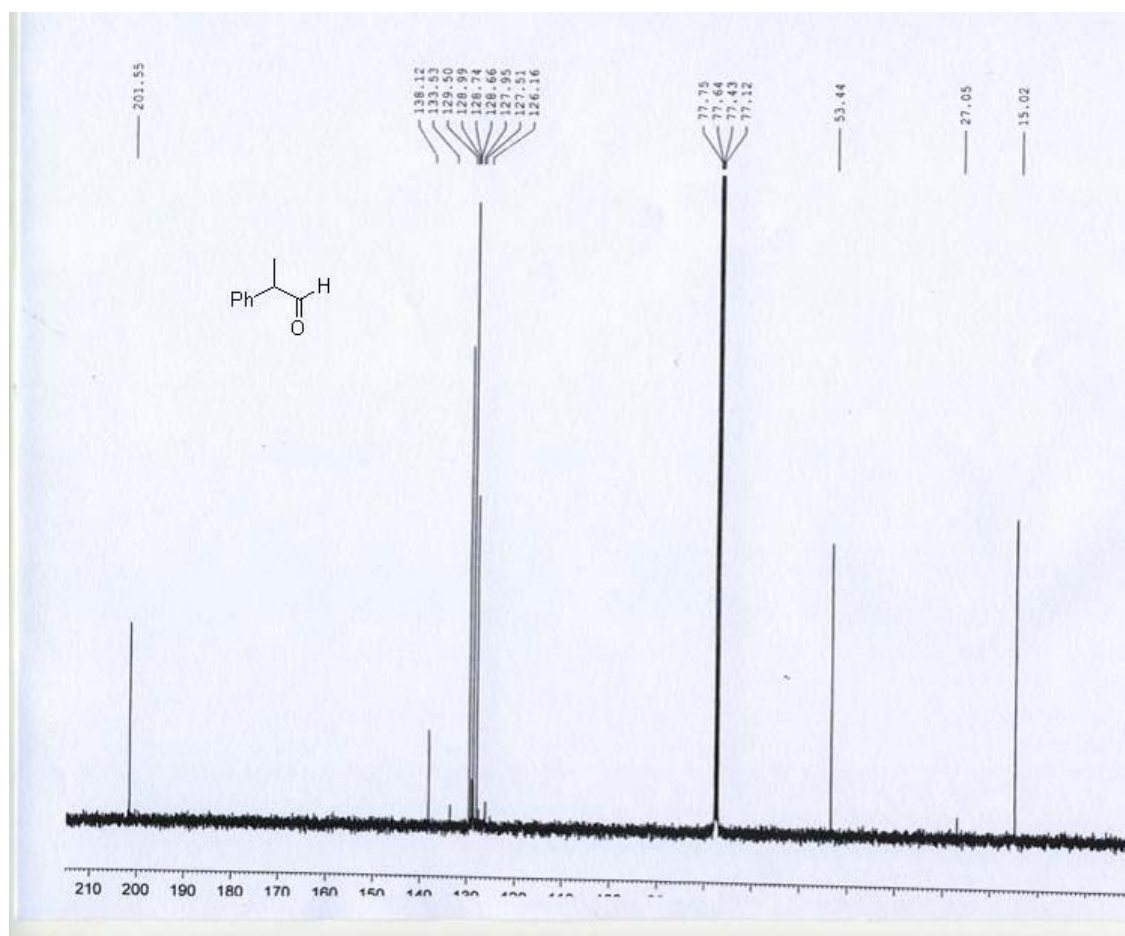

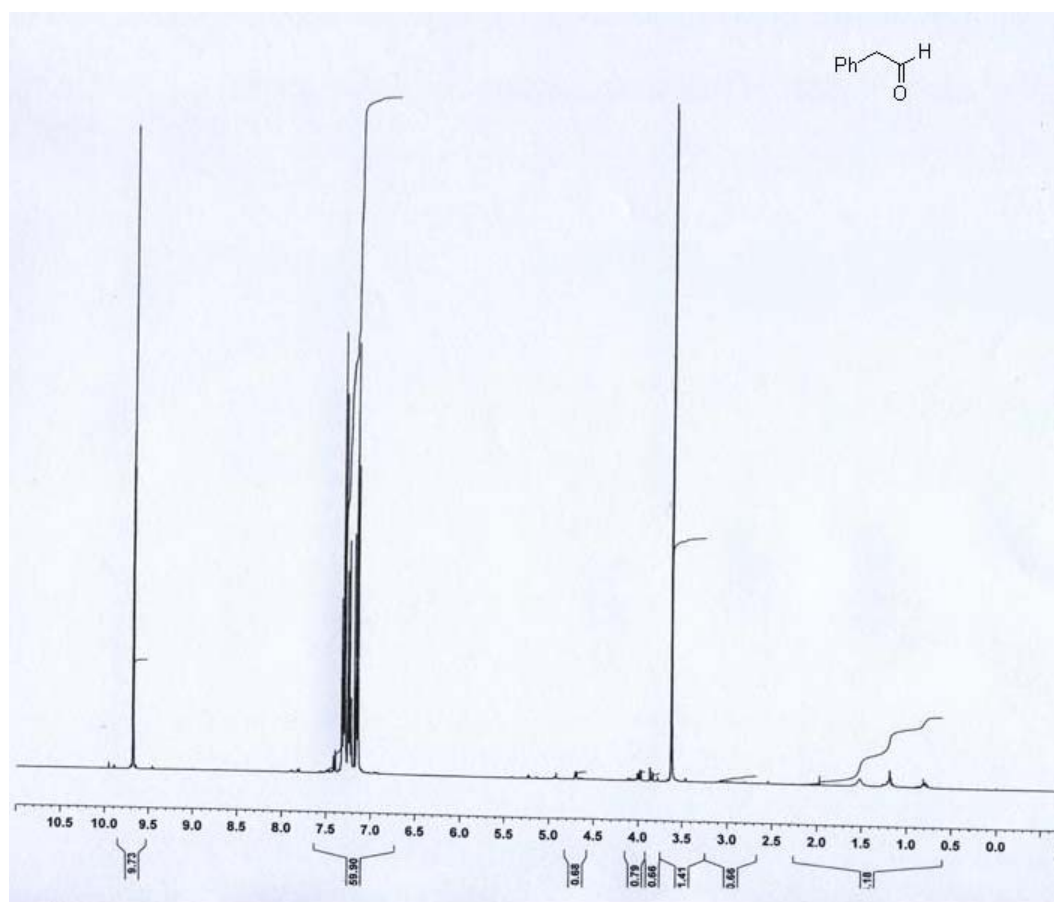

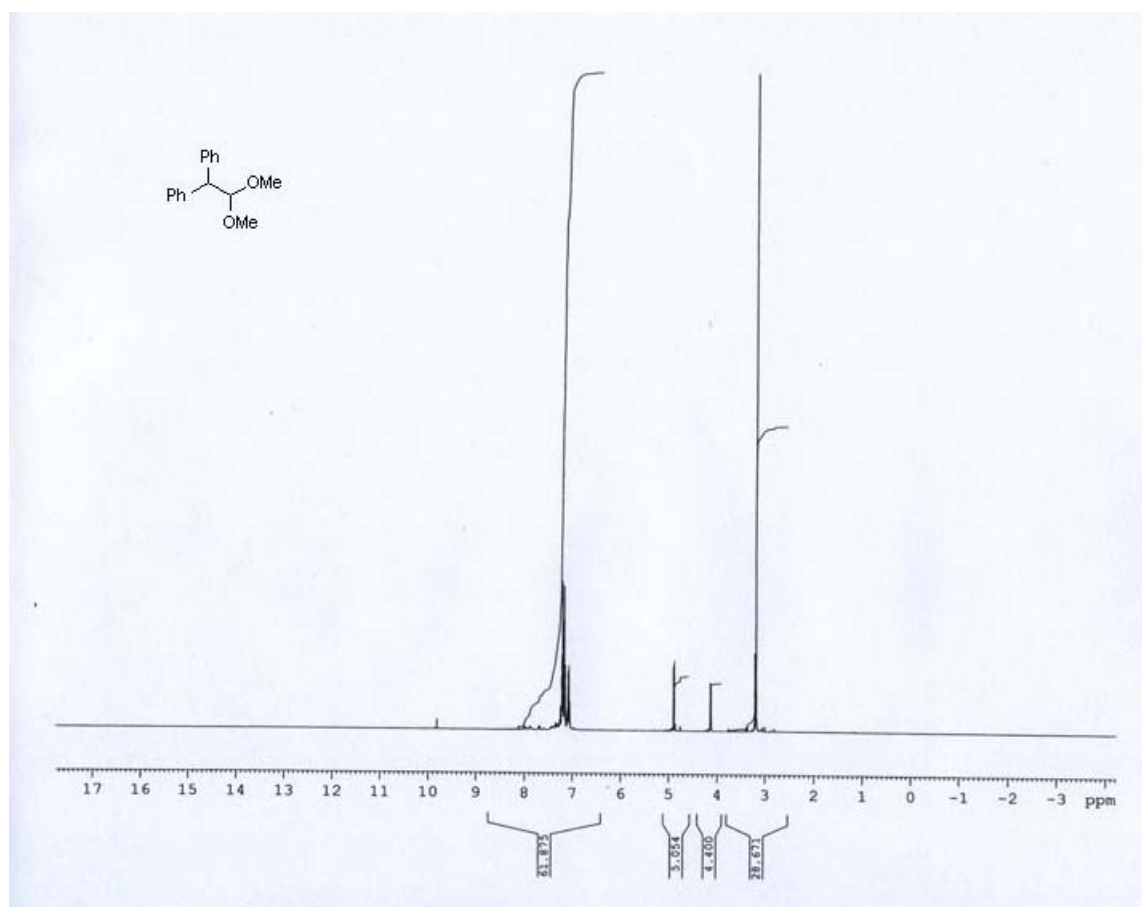

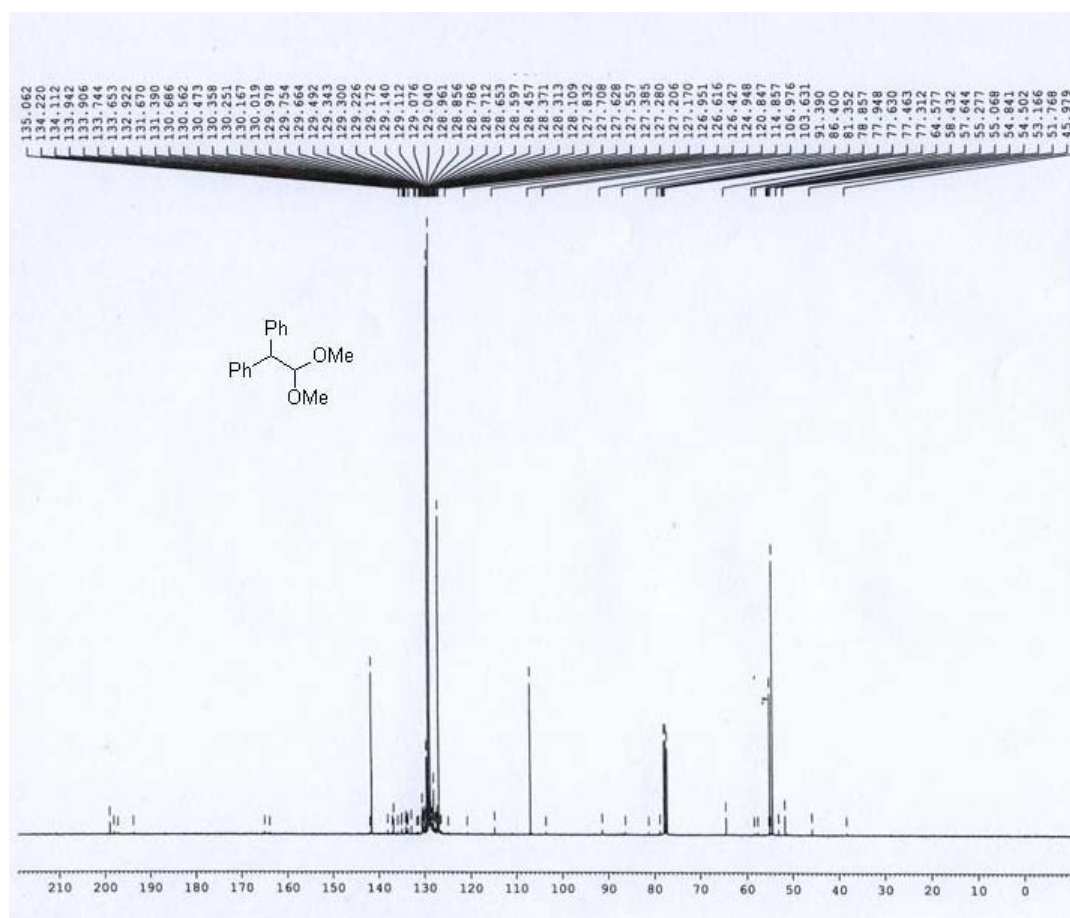

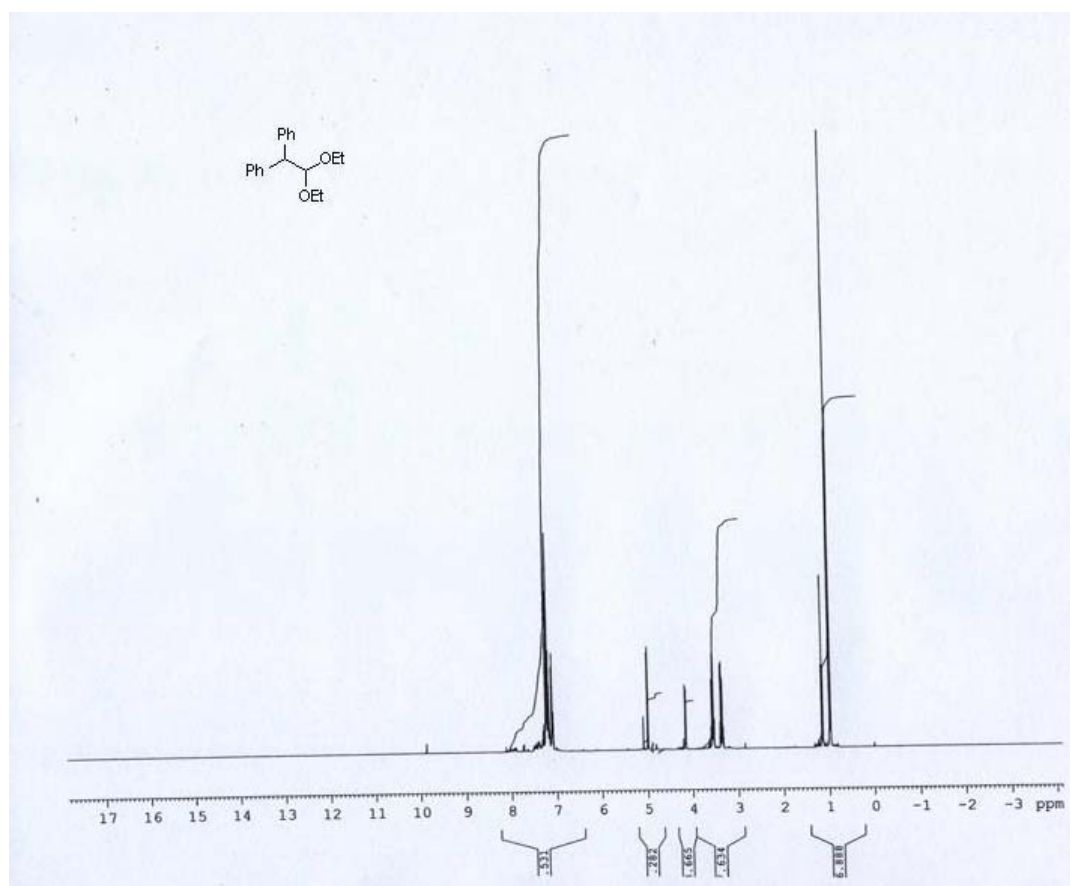

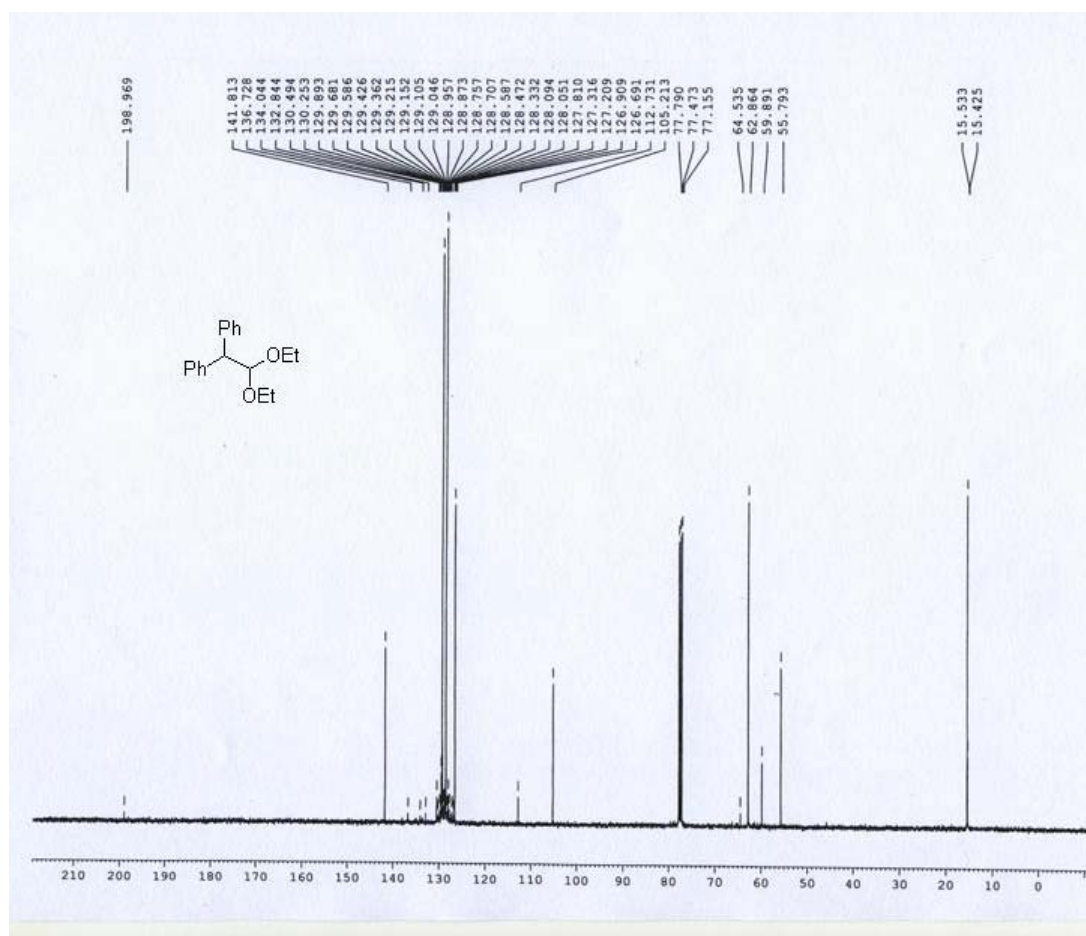



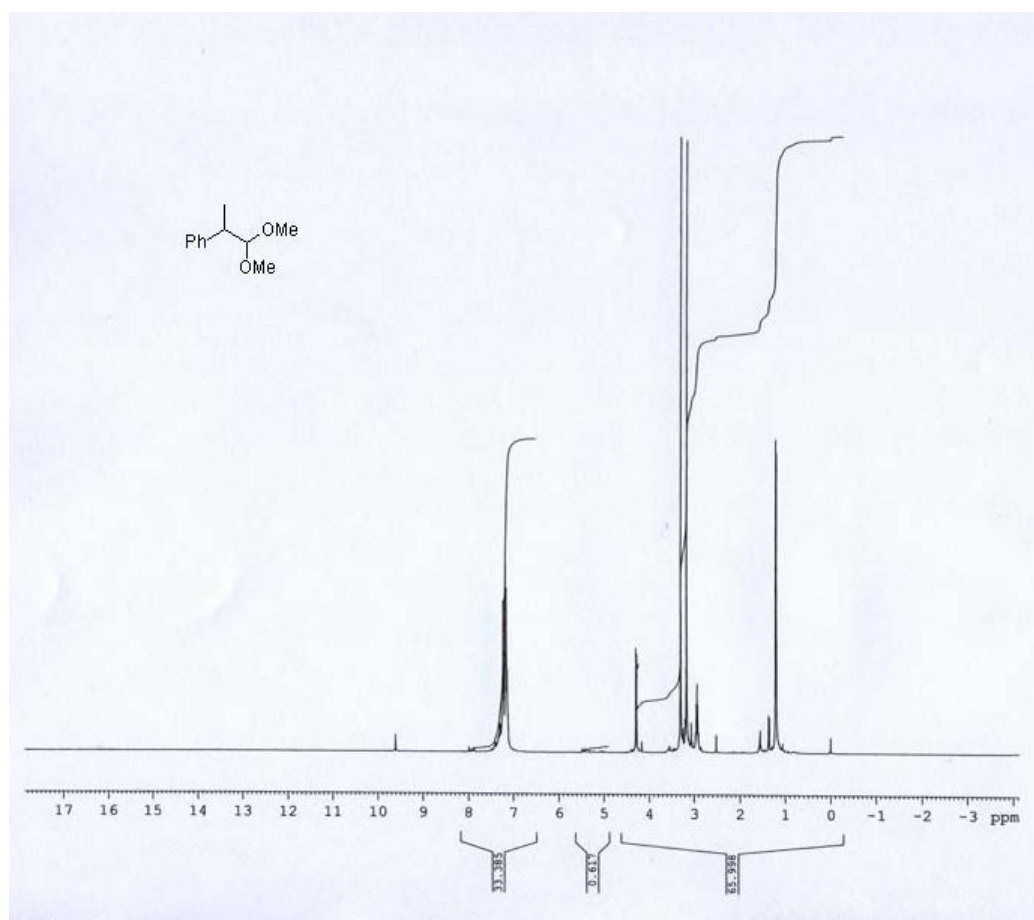

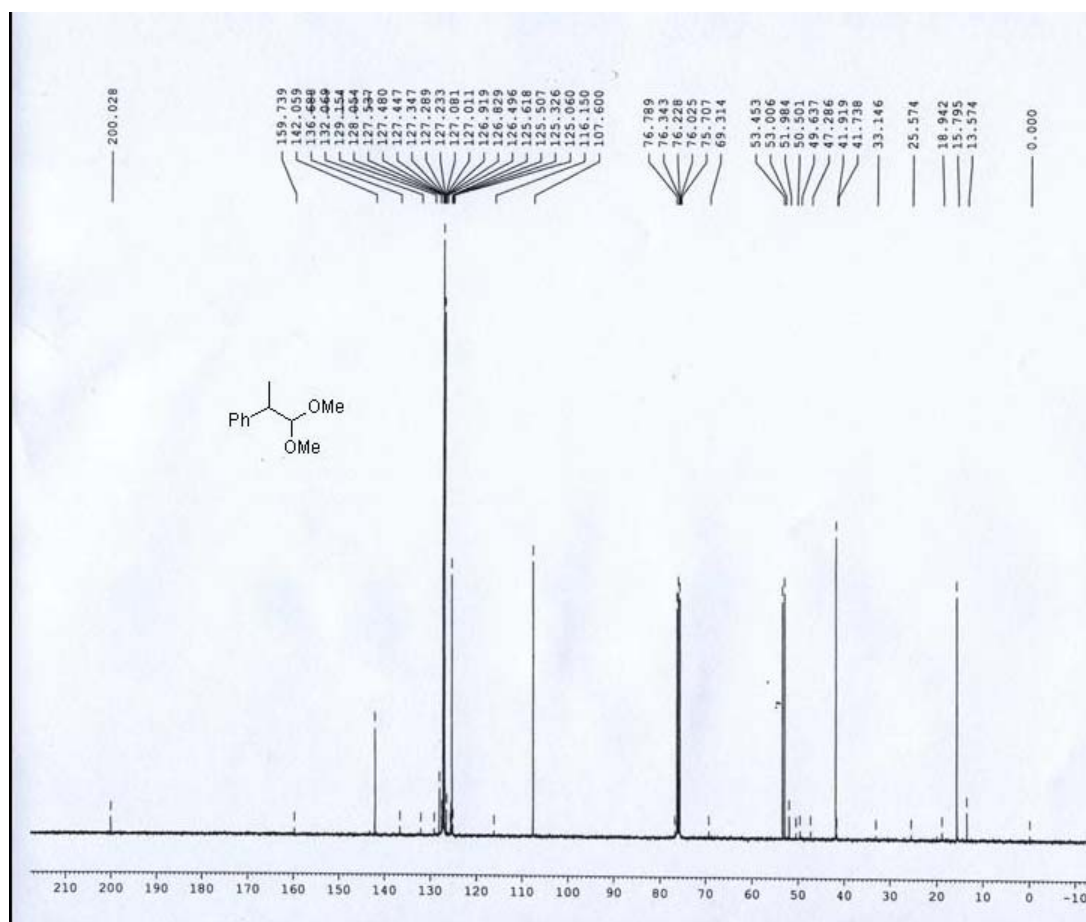

Supplement: b900719a.pdf [file b900719a.pdf]
